1                   **Ecophysiology of freshwater Verrucomicrobia inferred from**  
2                                   **metagenome-assembled genomes**

3  
4   Shaomei He<sup>1,2</sup>, Sarah LR Stevens<sup>1</sup>, Leong-Keat Chan<sup>4</sup>, Stefan Bertilsson<sup>3</sup>, Tijana Glavina del  
5   Rio<sup>4</sup>, Susannah G Tringe<sup>4</sup>, Rex R Malmstrom<sup>4</sup>, and Katherine D McMahon<sup>1,5,\*</sup>

6  
7   <sup>1</sup>Department of Bacteriology, University of Wisconsin-Madison, Madison, WI, USA

8   <sup>2</sup>Department of Geoscience, University of Wisconsin-Madison, Madison, WI, USA

9   <sup>3</sup>Department of Ecology and Genetics, Limnology and Science for Life Laboratory, Uppsala  
10   University, Uppsala, Sweden

11   <sup>4</sup>DOE Joint Genome Institute, Walnut Creek, CA, USA

12   <sup>5</sup>Department of Civil and Environmental Engineering, University of Wisconsin-Madison,  
13   Madison, WI, USA

14

15   **\*Corresponding author**

16   Katherine D McMahon ([trina.mcmahon@wisc.edu](mailto:trina.mcmahon@wisc.edu))

17

18

19   **Running title:** Freshwater Verrucomicrobia genomes

20

21   **Keywords:** Metagenome-assembled genome (MAG), Verrucomicrobia, Freshwater,  
22   Glycoside hydrolase, Nutrient limitation, Cytochrome *c*

23

24   **Word count** for the Abstract: 226

25   **Word count** for the text (excluding references and figure legends): 5850

26 **ABSTRACT**

27 Microbes are critical in carbon and nutrient cycling in freshwater ecosystems. Members of  
28 the Verrucomicrobia are ubiquitous in such systems, yet their roles and ecophysiology are  
29 not well understood. In this study, we recovered 19 Verrucomicrobia draft genomes by  
30 sequencing 184 time-series metagenomes from a eutrophic lake and a humic bog that differ  
31 in carbon source and nutrient availabilities. These genomes span four of the seven  
32 previously defined Verrucomicrobia subdivisions, and greatly expand the known genomic  
33 diversity of freshwater Verrucomicrobia. Genome analysis revealed their potential role as  
34 (poly)saccharide-degraders in freshwater, uncovered interesting genomic features for this  
35 life style, and suggested their adaptation to nutrient availabilities in their environments.  
36 Between the two lakes, Verrucomicrobia populations differ significantly in glycoside  
37 hydrolase gene abundance and functional profiles, reflecting the autochthonous and  
38 terrestrially-derived allochthonous carbon sources of the two ecosystems respectively.  
39 Interestingly, a number of genomes recovered from the bog contained gene clusters that  
40 potentially encode a novel porin-multiheme cytochrome *c* complex and might be involved  
41 in extracellular electron transfer in the anoxic humic-rich environment. Notably, most  
42 epilimnion genomes have large numbers of so-called “Planctomycete-specific” cytochrome  
43 *c*-containing genes, which exhibited nearly opposite distribution patterns with glycoside  
44 hydrolase genes, probably associated with the different environmental oxygen availability  
45 and carbohydrate complexity between lakes/layers. Overall, the recovered genomes are a  
46 major step towards understanding the role, ecophysiology and distribution of  
47 Verrucomicrobia in freshwater.

48

49 **IMPORTANCE**

50 Freshwater Verrucomicrobia are cosmopolitan in lakes and rivers, yet their roles and  
51 ecophysiology are not well understood, as cultured freshwater Verrucomicrobia are  
52 restricted to one subdivision of this phylum. Here, we greatly expand the known genomic  
53 diversity of this freshwater lineage by recovering 19 Verrucomicrobia draft genomes from  
54 184 metagenomes collected from a eutrophic lake and a humic bog across multiple years.  
55 Most of these genomes represent first freshwater representatives of several  
56 Verrucomicrobia subdivisions. Genomic analysis revealed Verrucomicrobia as potential  
57 (poly)saccharide-degraders, and suggested their adaptation to carbon source of different  
58 origins in the two contrasting ecosystems. We identified putative extracellular electron  
59 transfer genes and so-called “Planctomycete-specific” cytochrome *c*-containing genes, and  
60 found their distinct distribution patterns between the lakes/layers. Overall, our analysis  
61 greatly advances the understanding of the function, ecophysiology and distribution of  
62 freshwater Verrucomicrobia, while highlighting their potential role in freshwater carbon  
63 cycling.

64

## 65 **INTRODUCTION**

66 Verrucomicrobia are ubiquitous in freshwater and exhibit a cosmopolitan distribution in  
67 lakes and rivers. They are present in up to 90% of lakes (1), with abundances typically  
68 between <1% and 6% of total microbial community (2-4), but as high as 19% in a humic  
69 lake (5). Yet, in comparison to other freshwater bacterial groups, such as members of the  
70 Actinobacteria, Cyanobacteria and Proteobacteria phyla, Verrucomicrobia have received  
71 relatively less attention, and their functions and ecophysiology in freshwater are not well  
72 understood.

73           As a phylum, Verrucomicrobia (V) was first proposed relatively recently, in 1997  
74 (6). Together with Planctomycetes (P), Chlamydiae (C), and sister phyla such as  
75 Lentisphaerae, they comprise the PVC superphylum. In addition to being cosmopolitan in  
76 freshwater, Verrucomicrobia have been found in oceans (7, 8), soil (9, 10), wetlands (11),  
77 rhizosphere (12), and animal guts (13, 14), as free-living organisms or symbionts of  
78 eukaryotes. Verrucomicrobia isolates are metabolically diverse, including aerobes,  
79 facultative anaerobes, and obligate anaerobes, and they are mostly heterotrophs, using  
80 various mono-, oligo-, and poly-saccharides for growth (6, 7, 11, 14-20). Not long ago an  
81 autotrophic verrucomicrobial methanotroph (*Methylacidiphilum fumariolicum* SolV) was  
82 discovered in acidic thermophilic environments (21).

83           In marine environments, Verrucomicrobia are also ubiquitous (22) and suggested to  
84 have a key role as polysaccharide degraders (23, 24). Genomic insights gained through  
85 sequencing single cells (24) or extracting Verrucomicrobia bins from metagenomes (25)  
86 have revealed high abundances of glycoside hydrolase genes, providing more evidence for  
87 their critical roles in C cycling in marine environments.

88           In freshwater, Verrucomicrobia have been suggested to degrade glycolate (26) and  
89 polysaccharides (24). The abundance of some phylum members was favored by high  
90 nutrient availabilities (27, 28), cyanobacterial blooms (29), low pH, high temperature, high  
91 hydraulic retention time (30), and more labile DOC (5). To date, there are very few  
92 freshwater Verrucomicrobia isolates, including *Verrucomicrobium spinosum* (31) and  
93 several *Prostheco bacter* spp. (6). Physiological studies showed that they are aerobes,  
94 primarily using carbohydrates, but not amino acids, alcohols, or rarely organic acids for  
95 growth. However, these few cultured isolates only represent a single clade within

96 subdivision 1. By contrast, 16S rRNA gene based studies discovered a much wider  
97 phylogenic range of freshwater Verrucomicrobia, including subdivisions 1, 2, 3, 4, 5, and 6  
98 (3-5, 24, 32). Due to the very few cultured representatives and few available genomes from  
99 this freshwater lineage, the ecological functions of the vast uncultured freshwater  
100 Verrucomicrobia are largely unknown.

101 In this study, we sequenced a total of 184 metagenomes in a time-series study of  
102 two lakes with contrasting characteristics, particularly differing in C source, nutrient  
103 availabilities, and pH. We recovered a total of 19 Verrucomicrobia draft genomes spanning  
104 subdivision 1, 2, 3, and 4 of the seven previously defined Verrucomicrobia subdivisions. We  
105 inferred their metabolisms, revealed their adaptation to C and nutrient conditions, and  
106 uncovered some interesting and novel features, including a novel putative porin-  
107 multiheme cytochrome *c* system that may be involved in extracellular electron transfer.  
108 The gained insights advanced our understanding of the ecophysiology, and suggested  
109 potential roles in C cycling and ecological niches of this ubiquitous freshwater bacterial  
110 group.

111

## 112 **RESULTS AND DISCUSSION**

### 113 **Comparison of the two lakes**

114 The two studied lakes exhibited contrasting characteristics (**Table 1**). The most notable  
115 difference is the primary C source and nutrient availabilities. Mendota is an urban  
116 eutrophic lake with most of its C being autochthonous (in-lake produced through  
117 photosynthesis). By contrast, Trout Bog is a nutrient-poor dystrophic lake, surrounded by  
118 temperate forests and sphagnum mats, thus receiving large amounts of terrestrially-

119 derived allochthonous C that is rich in humic and fulvic acids. Compared to Mendota, Trout  
120 Bog features higher DOC levels, but is more limited in nutrient availability, with much  
121 higher DOC:TN and DOC:TP ratios (**Table 1**). Nutrient limitation in Trout Bog is even more  
122 extreme than revealed by these ratios because much of the N and P is tied up in complex  
123 dissolved organic matter. In addition, Trout Bog has lower oxygenic photosynthesis due to  
124 decreased photosynthetically active radiation (PAR) as a result of absorption by DOC (33).  
125 Together with the consumption of dissolved oxygen by heterotrophic respiration, oxygen  
126 levels decrease quickly with depth in the water column in Trout Bog. Dissolved oxygen  
127 levels are below detection in the hypolimnion nearly year-round (34). Due to these  
128 contrasts, we expected to observe differences in bacterial C and nutrient use, as well as  
129 differences reflecting the electron acceptor conditions between these two lakes. Hence, the  
130 retrieval of numerous Verrucomicrobia draft genomes in the two lakes not only allows the  
131 prediction of their general functions in freshwater, but also provides an opportunity to  
132 study their ecophysiological adaptation to the local environmental differences.

133

#### 134 **Verrucomicrobia draft genome retrieval and their distribution patterns**

135 A total of 184 metagenomes were generated from samples collected across multiple years,  
136 including 94 from the top 12 m of Mendota (mostly consisting of the epilimnion layer,  
137 therefor referred to as “ME”), 45 from Trout Bog epilimnion (“TE”), and 45 from Trout Bog  
138 hypolimnion (“TH”). Three combined assemblies were generated by co-assembling reads  
139 from all metagenomes within the ME, TE, and TH groups, respectively. Using the binning  
140 facilitated by tetranucleotide frequency and relative abundance patterns over time, a total  
141 of 19 Verrucomicrobia metagenome-assembled genomes (MAGs) were obtained, including

142 eight from the combined assembly of ME, three from the combined assembly of TE, and  
143 eight from the combined assembly of TH (**Table 2**). The 19 MAGs exhibited a clustering of  
144 their tetranucleotide frequency largely based on the two lakes (**Fig. S1**), suggesting distinct  
145 overall genomic signatures associated with each system.

146 Genome completeness of the 19 MAGs ranged from 51% to 95%, as determined by  
147 checkM (35). Phylogenetic analysis of these MAGs using a concatenated alignment of their  
148 conserved genes indicates that they span a wide phylogenetic spectrum and distribute in  
149 subdivisions 1, 2, 3, and 4 of the seven previously defined Verrucomicrobia subdivisions (5,  
150 21, 36) (**Fig. 1**), as well as three unclassified Verrucomicrobia MAGs.

151 Presently available freshwater Verrucomicrobia isolates are restricted to  
152 subdivision 1. The recovered MAGs allow the inference of metabolisms and ecology of a  
153 considerable diversity within uncultured freshwater Verrucomicrobia. Notably, all MAGs  
154 from subdivision 3 were recovered from TH, and all MAGs from subdivision 1, except  
155 TH2746, were from the epilimnion (either ME or TE), indicating differences in phylogenetic  
156 distribution between lakes and between layers within a lake.

157 We used normalized coverage depth of MAGs within individual metagenomes  
158 collected at different sampling time points and different lakes/layers to comparatively infer  
159 relative population abundance across time and space (see detailed coverage depth  
160 estimation in **Supplementary Text**). Briefly, we mapped reads from each metagenome to  
161 MAGs with a minimum identity of 95%, and used the number of mapped reads to calculate  
162 the relative abundance for each MAG based on coverage depth per contig and several  
163 normalization steps. Thus, we assume that each MAG represents a distinct population  
164 within the lake-layer from which it was recovered (37, 38). This estimate does not directly

165 indicate the actual relative abundance of these populations within the total community per  
166 se; rather it allows us to compare population abundance levels from different lakes and  
167 sampling occasions within the set of 19 MAGs. This analysis indicates that Verrucomicrobia  
168 populations in Trout Bog were proportionally more abundant and persistent over time  
169 compared to those in Mendota in general (**Table 2**). Verrucomicrobia populations in  
170 Mendota boosted their abundances once to a few times during the sampling season and  
171 diminished to extremely low levels for the remainder of the sampling season (generally  
172 May to November), as reflected by the low median coverage depth of Mendota MAGs and  
173 their large coefficient of variation (**Table 2**)

174

#### 175 **Saccharolytic life style and adaptation to different C sources**

176 Verrucomicrobia isolates from different environments are known to grow on various  
177 mono-, oligo-, and poly-saccharides, but are unable to grow on amino acids, alcohols, or  
178 most organic acids (6, 7, 11, 14-20, 39). Culture-independent research suggests marine  
179 Verrucomicrobia as candidate polysaccharide degraders with large number of genes  
180 involved in polysaccharide utilization (23-25).

181 In the 19 Verrucomicrobia MAGs, we observed rich arrays of glycoside hydrolase  
182 (GH) genes, representing a total of 78 different GH families acting on diverse  
183 polysaccharides (**Fig. S2**). Although these genomes have different degrees of completeness,  
184 genome completeness was not correlated with the number of GH genes recovered  
185 (correlation coefficient = 0.312, p-value = 0.194), or the number of GH families represented  
186 in each MAG (i.e. GH diversity, correlation coefficient = 0.278, p-value = 0.250). To compare  
187 GH abundance among MAGs, we normalized GH occurrence frequencies by the total



188 number of genes in each MAG to estimate the percentage of genes annotated as GHs (i.e. GH  
189 coding density) to account for the different genome size and completeness. This  
190 normalization assumes GH genes are randomly distributed between the recovered and the  
191 missing parts of the genome, and it allows us to make some general comparison among  
192 these MAGs. GH coding density ranged from 0.4% to 4.9% for these MAGs (**Fig. 2a**), and in  
193 general, was higher in Trout Bog MAGs than in Mendota MAGs. Notably, six TH MAGs had  
194 extremely high (~4%) GH coding densities (**Fig. 2a**), with each MAG harboring 119-239 GH  
195 genes, representing 36-59 different GH families (**Fig. 3 and S2**). Although GH coding  
196 density in most ME genomes in subdivisions 1 and 2 was relatively low (0.4-1.6%), it was  
197 still higher than in many other bacterial groups (24).

198 The GH abundance and diversity within a genome may determine the width of the  
199 substrate spectrum and/or the complexity of carbohydrates used by that organism. For  
200 example, there are 20 GH genes in the *Rubritalea marina* genome, and this marine  
201 verrucomicrobial aerobe only uses a limited spectrum of carbohydrate monomers and  
202 dimers, but not the majority of (poly)saccharides tested (15). By contrast, 164 GH genes  
203 are present in the *Opitutus terrae* genome, and this soil verrucomicrobial anaerobe can thus  
204 grow on a wider range of mono-, di- and poly-saccharides (16). Therefore, it is plausible  
205 that the GH-rich Trout Bog Verrucomicrobia populations may be able to use a wider range  
206 of more complex polysaccharides than the Mendota populations.

207 The 10 most abundant GH families in these Verrucomicrobia MAGs include GH2, 29,  
208 78, 95, and 106 (**Fig. 3**). These specific GHs were absent or at very low abundances in  
209 marine Verrucomicrobia genomes (24, 25), suggesting a general difference in carbohydrate  
210 substrate use between freshwater- and marine Verrucomicrobia. Hierarchical clustering of

211 MAGs based on overall GH abundance profiles indicated a grouping pattern largely  
212 separated by lake (**Fig. S3**). Prominently over-represented GHs in most Trout Bog MAGs  
213 include GH2, GH29, 78, 95, and 106. By contrast, over-represented GHs in the Mendota  
214 MAGs are GH13, 20, 33, 57, and 77, which have different substrate spectra from GHs over-  
215 represented in the Trout Bog MAGs. Therefore, the patterns in GH functional profiles may  
216 suggest varied carbohydrate substrate preferences and ecological niches occupied by  
217 Verrucomicrobia, probably reflecting the different carbohydrate composition derived from  
218 different sources between Mendota and Trout Bog.

219 Overall, GH diversity and abundance profile may reflect the DOC availability,  
220 chemical variety and complexity, and suggest microbial adaptation to different C sources in  
221 the two ecosystems. We speculate that the rich arrays of GH genes, and presumably  
222 broader substrate spectra of Trout Bog populations, partly contribute to their higher  
223 abundance and persistence over the sampling season (**Table 2**), as they are less likely  
224 impacted by fluctuations of individual carbohydrates. By contrast, Mendota populations  
225 with fewer GHs and presumably more specific substrate spectra are relying on  
226 autochthonous C and therefore exhibit a “bloom-and-bust” abundance pattern (**Table 2**)  
227 that might be associated with cyanobacterial blooms as previous suggested (29). On the  
228 other hand, bogs experience seasonal phytoplankton blooms (40, 41) that introduce brief  
229 pulses of autochthonous C to these otherwise allochthonous-driven systems. Clearly, much  
230 remains to be learned about the routes through which C is metabolized by bacteria in such  
231 lakes, and comparative genomics is a novel way to use the organisms to tell us about C flow  
232 through the ecosystem.

233

## 234 **Other genome features of the saccharide-degrading life style**

235 Seven Verrucomicrobia MAGs spanning subdivisions 1, 2, 3, and 4 possess genes needed to  
236 construct bacterial microcompartments (BMCs), which are quite rare among studied  
237 bacterial lineages. Such BMC genes in Planctomycetes are involved in the degradation of  
238 plant and algal cell wall sugars, and are required for growth on L-fucose, L-rhamnose and  
239 fucoidans (42). Genes involved in L-fucose and L-rhamnose degradation cluster with BMC  
240 shell protein-coding genes in the seven Verrucomicrobia MAGs (**Fig. 4**). This is consistent  
241 with the high abundance of  $\alpha$ -L-fucosidase or  $\alpha$ -L-rhamnosidase GH genes (represented  
242 by GH29, 78, 95, 106) in most of these MAGs (**Fig. 3**), suggesting the importance of fucose-  
243 and rhamnose-containing polysaccharides for these Verrucomicrobia populations.

244 TonB-dependent receptor (TBDR) genes were found in Verrucomicrobia MAGs, and  
245 are present at over 20 copies in TE1800 and TH2519. TBDRs are located on the outer  
246 cellular membrane of Gram-negative bacteria, usually mediating the transport of iron  
247 siderophore complex and vitamin B<sub>12</sub> across the outer membrane through an active  
248 process. More recently, TBDRs were suggested to be involved in carbohydrate transport  
249 across the outer membrane by some bacteria that consume complex carbohydrates, and in  
250 their carbohydrate utilization (CUT) loci, TBDR genes usually cluster with genes encoding  
251 inner membrane transporters, GHs and regulators for efficient carbohydrate  
252 transportation and utilization (43). Such novel CUT loci are present in TE1800 and  
253 TH2519, with TBDR genes clustering with genes encoding inner membrane sugar  
254 transporters, monosaccharide utilization enzymes, and GHs involved in the degradation of  
255 pectin, xylan, and fucose-containing polymers (**Fig. 5**). Notably, most GHs in the CUT loci  
256 are predicted to be extracellular or outer membrane proteins (**Fig. 5**), catalyzing

257 extracellular hydrolysis reactions to release mono- and oligo-saccharides, which are  
258 transported across the outer membrane by TBDR proteins. Therefore, such CUT loci may  
259 allow these verrucomicrobial populations to coordinately and effectively scavenge the  
260 hydrolysis products before they diffuse away.

261 Genes encoding for inner membrane carbohydrate transporters are abundant in  
262 Verrucomicrobia MAGs (**Fig. S4**). The Embden-Meyerhof pathway for glucose degradation,  
263 as well as pathways for degrading a variety of other sugar monomers, including galactose,  
264 rhamnose, fucose, xylose, and mannose, were recovered (complete or partly-complete) in  
265 most MAGs (**Fig. 6**). As these sugars are abundant carbohydrate monomers in plankton and  
266 plant cell walls, the presence of these pathways together with GH genes suggest that these  
267 Verrucomicrobia populations may use plankton- and plant-derived saccharides. Machinery  
268 for pyruvate degradation to acetyl-CoA and the TCA cycle are also present in most MAGs.  
269 These results are largely consistent with their hypothesized role in carbohydrate  
270 degradation and previous studies on Verrucomicrobia isolates.

271 Notably, a large number of genes encoding proteins belonging to a sulfatase family  
272 (pfam00884) are present in the majority of MAGs (**Fig. 2b**), similar to the high  
273 representation of these genes in marine Verrucomicrobia genomes (24, 25). Sulfatases  
274 hydrolyze sulfate esters, which are rich in sulfated polysaccharides. In general, sulfated  
275 polysaccharides are abundant in marine algae and plants (mainly in seaweeds) (44), but  
276 have also been found in some freshwater cyanobacteria (45) and plant species (46).  
277 Sulfatase genes in our Verrucomicrobia MAGs were often located in the same neighborhood  
278 as genes encoding for extracellular proteins with a putative pectin lyase activity, proteins  
279 with a carbohydrate-binding module (pfam13385), GHs, and proteins with PSCyt domains

280 (Fig. 2c and discussed later). Their genome context lends support for the participation of  
281 these genes in C and sulfur cycling by degrading sulfated polysaccharides, which can serve  
282 as an abundant source of sulfur for cell biosynthesis as well as C for energy and growth.

283 Previously, freshwater Verrucomicrobia were suggested to use the algal exudate  
284 glycolate in humic lakes, based on the retrieval of genes encoding subunit D (*glcD*) of  
285 glycolate oxidase, which converts glycolate to glyoxylate (26). However, these recovered  
286 genes might not be bona fide *glcD* due to the lack of other essential subunits as revealed in  
287 our study (see **Supplementary Text**). Among the MAGs, only TE4605 possesses all three  
288 essential subunits of glycolate oxidase (*glcDEF*) (**Fig. S5**). However, genetic context analysis  
289 suggests that TE4605 likely uses glycolate for amino acid assimilation, instead of energy  
290 generation (**Fig. S5** and **Supplementary Text**). These results are consistent with the  
291 absence of the glyoxylate shunt and especially the malate synthase, which converts  
292 glyoxylate to malate to be used through the TCA cycle for energy generation in the 19  
293 Verrucomicrobia MAGs (**Fig. S6**). Therefore, Verrucomicrobia populations represented by  
294 the 19 MAGs are not likely key players in glycolate degradation, but more likely important  
295 (poly)saccharide-degraders in freshwater, as suggested by the high abundance of GH,  
296 sulfatase, and carbohydrate transporter genes, metabolic pathways for degrading diverse  
297 carbohydrate monomers, and other genome features adapted to the saccharolytic life style.

298

### 299 **Nitrogen (N) metabolism and adaptation to different N availabilities**

300 Most Verrucomicrobia MAGs in our study do not appear to reduce nitrate or other  
301 nitrogenous compounds, and they seem to uptake and use ammonia (**Fig. 6**), and  
302 occasionally amino acids (**Fig. S4**), as an N-source. Further, some Trout Bog populations

303 may have additional avenues to generate ammonia, including genetic machineries for  
304 assimilatory nitrate reduction in TH2746, nitrogenase genes for nitrogen fixation and  
305 urease genes in some of the Trout Bog MAGs (**Fig. 6**), probably as adaptations to N-limited  
306 conditions in Trout Bog.

307         Although Mendota is a eutrophic lake, N can become temporarily limiting during the  
308 high-biomass period when N is consumed by large amounts of phytoplankton and  
309 bacterioplankton (47). For some bacteria, when N is temporarily limited while C is in  
310 excess, cells convert and store the extra C as biopolymers. For example, the  
311 verrucomicrobial methanotroph *M. fumariolicum* SolV accumulated a large amount of  
312 glycogen (up to 36% of the total dry weight of cells) when the culture was N-limited (48).  
313 Similar to this verrucomicrobial methanotroph, genes in glycogen biosynthesis are present  
314 in most MAGs from Mendota and Trout Bog (**Fig. 6**). Indeed, a glycogen synthesis pathway  
315 is also present in most genomes of cultivated Verrucomicrobia in the public database (data  
316 not shown), suggesting that glycogen accumulation might be a common feature for this  
317 phylum to cope with the changing pools of C and N in the environment and facilitate their  
318 survival when either is temporally limited.

319

### 320 **Phosphorus (P) metabolism and other metabolic features**

321 Verrucomicrobia populations represented by these MAGs may be able to survive under low  
322 P conditions, as suggested by the presence of genes responding to P limitation, such as the  
323 two-component regulator (*phoRB*), alkaline phosphatase (*phoA*), phosphonoacetate  
324 hydrolase (*phnA*), and high-affinity phosphate-specific transporter system (*pstABC*) (**Fig.**  
325 **6**). Detailed discussion in P acquisition and metabolism and other metabolic aspects, such

326 as acetate metabolism, sulfur metabolism, oxygen tolerance, and the presence of the  
327 alternative complex III and cytochrome *c* oxidase genes in the oxidative phosphorylation  
328 pathway, are discussed in the Supplementary Text (**Fig. S6**).

329

### 330 **Anaerobic respiration and a putative porin-multiheme cytochrome *c* system**

331 Respiration using alternative electron acceptors is important for overall lake metabolism in  
332 the DOC-rich humic Trout Bog, as the oxygen levels decrease quickly with depth in the  
333 water column. We therefore searched for genes involved in anaerobic respiration, and  
334 found that genes in the dissimilatory reduction of nitrate, nitrite, sulfate, sulfite, DMSO, and  
335 TMAO are largely absent in all MAGs (**Supplementary Text, Fig. S6**). Compared to those  
336 anaerobic processes, genes for dissimilatory metal reduction are less well understood. In  
337 more extensively studied cultured iron [Fe(III)] reducers, outer surface *c*-type cytochromes  
338 (*cytc*), such as OmcE and OmcS in *Geobacter sulfurreducens* are involved in Fe(III)  
339 reduction at the cell outer surface (49). Further, a periplasmic multiheme cytochrome *c*  
340 (MHC, e.g. MtrA in *Shewanella oneidensis* and OmaB/OmaC in *G. sulfurreducens*) can be  
341 embedded into a porin (e.g. MtrB in *S. oneidensis* and OmbB/OmbC in *G. sulfurreducens*),  
342 forming a porin-MHC complex as an extracellular electron transfer (EET) conduit to reduce  
343 extracellular Fe(III) (50, 51). Such outer surface *cytc* and porin-MHC systems involved in  
344 Fe(III) reduction were also suggested to be important in reducing the quinone groups in  
345 humic substances (HS) at the cell surface (52-54). The reduced HS can be re-oxidized by  
346 Fe(III) or oxygen, thus HS can serve as electron shuttles to facilitate Fe(III) reduction (55,  
347 56) or as regenerable electron acceptors at the anoxic-oxic interface or over redox cycles  
348 (57).

349 Outer surface cytc or porin-MHC systems homologous to the ones in *G.*  
350 *sulfurreducens* and *S. oneidensis* are not present in Verrucomicrobia MAGs. Instead, we  
351 identified a novel porin-coding gene clustering with MHC genes in six MAGs (**Fig. 7**). These  
352 porins were predicted to have at least 20 transmembrane motifs, and their adjacent cytc  
353 were predicted to be periplasmic proteins with eight conserved heme-binding sites. In  
354 several cases, a gene encoding an extracellular MHC is also located in the same gene cluster.  
355 As their gene organization is analogous to the porin-MHC gene clusters in *G. sulfurreducens*  
356 and *S. oneidensis*, we hypothesize that these genes in Verrucomicrobia may encode a novel  
357 porin-MHC complex involved in EET.

358 As these porin-MHC gene clusters are novel, we further confirmed that they are  
359 indeed from Verrucomicrobia. Their containing contigs were indeed classified to  
360 Verrucomicrobia based on the consensus of the best BLASTP hits for genes on these  
361 contigs. Notably, the porin-MHC gene cluster was only observed in MAGs recovered from  
362 the HS-rich Trout Bog, especially from the anoxic hypolimnion environment. Searching the  
363 NCBI and IMG databases for the porin-MHC gene clusters homologous to those in Trout  
364 Bog, we identified homologs in genomes within the Verrucomicrobia phylum, including  
365 *Opitutus terrae* PB90-1 isolated from rice paddy soil, *Opitutus* sp. GAS368 isolated from  
366 forest soil, "*Candidatus* Udaeobacter copiosus" recovered from prairie soil, Opititae-40 and  
367 Opititae-129 recovered from freshwater sediment, and Verrucomicrobia bacterium  
368 IMCC26134 recovered from freshwater; some of their residing environments are also rich  
369 in HS. Therefore, based on the occurrence pattern of porin-MHC among Verrucomicrobia  
370 genomes, we hypothesize that such porin-MHCs might participate in EET to HS in anoxic  
371 HS-rich environments, and HS may further shuttle electrons to poorly soluble metal oxides



372 or be regenerated at the anoxic-oxic interface, thereby diverting more C flux to respiration  
373 instead of fermentation and methanogenesis, which could impact the overall energy  
374 metabolism and green-house gas emission in the bog environment.

375

### 376 **Occurrence of Planctomycete-specific cytochrome *c* and domains**

377 One of the interesting features of Verrucomicrobia and its sister phyla in the PVC  
378 superphylum is the presence of a number of novel protein domains in some of their  
379 member genomes (58, 59). These domains were initially identified in marine  
380 planctomycete *Rhodopirellula baltica* (58) and therefore, were referred to as  
381 “Planctomycete-specific”, although some of them were later identified in other PVC  
382 members (59). In our Verrucomicrobia MAGs, most genes containing Planctomycete-  
383 specific cytochrome *c* domains (PSCyt1 to PSCyt3) also contain other Planctomycete-  
384 specific domains (PSD1 through PSD5) with various combinations and arrangements (**Fig.**  
385 **8** and **S7a**). Further, PSCyt2-containing and PSCyt3-containing genes are usually next to  
386 two different families of unknown genes, respectively (**Fig. S7b**). Such conserved domain  
387 architectures and gene organizations, as well as their high occurrence frequencies in some  
388 of the Verrucomicrobia MAGs are intriguing, yet nothing is known about their functions.  
389 However, some of the PSCyt-containing genes also contain protein domains identifiable as  
390 carbohydrate-binding modules (CBMs), suggesting a role in carbohydrate metabolism (see  
391 detailed discussion in **Supplementary Text**).

392 The coding density of PSCyt-containing genes indicates that they tend to be more  
393 abundant in the epilimnion (either ME or TE) genomes (**Fig. 2c**) and exhibit an inverse  
394 correlation with the GH coding density ( $r = -0.62$ ). Interestingly, sulfatase-coding genes are

395 often in the neighborhood of PSCyt-containing genes in ME and TE genomes, whereas  
396 sulfatase-coding genes often neighbor with GH genes in TH genomes. The genomic context  
397 suggests PSCyt-containing gene functions somewhat mirror those of GHs (although their  
398 reaction mechanisms likely differ fundamentally). However, these PSCyt-containing genes  
399 were predicted to be periplasmic or cytoplasmic proteins rather than extracellular or outer  
400 membrane proteins. Hence, if they are indeed involved in carbohydrate degradation, they  
401 likely act on mono- or oligomers that can be transported into the cell. Further, the  
402 distribution patterns of GH versus PSCyt-containing genes between the epilimnion and  
403 hypolimnion may reflect the difference in oxygen availability and their carbohydrate  
404 substrate complexity between the two layers, suggesting some niche differentiation within  
405 Verrucomicrobia in freshwater systems. Therefore, we suggest that a combination of  
406 carbohydrate composition, electron acceptor availability and C accessibility drive gene  
407 distributions in these populations.

408

## 409 **Summary**

410 Verrucomicrobia MAGs recovered from the two contrasting lakes greatly expanded the  
411 known genomic diversity of freshwater Verrucomicrobia, revealed the ecophysiology and  
412 some interesting adaptive features of this ubiquitous yet less understood freshwater  
413 lineage. The overrepresentation of GH, sulfatase, and carbohydrate transporter genes, the  
414 genetic potential to use various sugars, and the microcompartments for fucose and  
415 rhamnose degradation suggest that they are potentially (poly)saccharide degraders in  
416 freshwater. Most of the MAGs encode machineries to cope with the changing availability of  
417 N and P and can survive nutrient limitation. Despite these generalities, these

418 Verrucomicrobia differ significantly between lakes in the abundance and functional profiles  
419 of their GH genes, which may reflect different C sources of the two lakes. Interestingly, a  
420 number of MAGs in Trout Bog possess gene clusters potentially encoding a novel porin-  
421 multiheme cytochrome *c* complex, and might be involved in extracellular electron transfer  
422 in the anoxic humic-rich environment. Intriguingly, large numbers of Planctomycete-  
423 specific cytochrome *c*-containing genes are present in MAGs from the epilimnion,  
424 exhibiting nearly opposite distribution patterns with GH genes. Future studies are needed  
425 to elucidate the functions of these novel and fascinating genomic features.

426 In this study, we focused on using genome information to infer ecophysiology of  
427 Verrucomicrobia. The rich time-series metagenome dataset and the many diverse  
428 microbial genomes recovered in these two lakes also provide an opportunity for the future  
429 study of Verrucomicrobia population dynamics in the context of the total community and  
430 their interactions with environmental variables and other microbial groups.

431 As some of the MAGs analyzed here represent first genome representatives of  
432 several Verrucomicrobia subdivisions from freshwater, an interesting question is whether  
433 populations represented by the MAGs are native aquatic residents and active in aquatic  
434 environment, or merely present after having been washed into the lake from surrounding  
435 soil. Previous studies on freshwater Verrucomicrobia were largely based on 16S rRNA  
436 genes, yet 16S rRNA genes were not recovered in most MAGs, making it difficult to directly  
437 link our MAGs to previously identified freshwater Verrucomicrobia. Notably, our MAGs  
438 were only distantly related to the ubiquitous and abundant soil Verrucomicrobia,  
439 “*Candidatus* Udaeobacter copiosus” (10) (**Fig. 1**). In addition, Verrucomicrobia were  
440 abundant in Trout Bog and other bogs from a five-year bog lake bacterial community

441 composition and dynamics study (60), with average relative abundance of 7.1% and 8.6%,  
442 and maximal relative abundance of 25.4% and 39.5% in Trout Bog epilimnion and  
443 hypolimnion respectively. Since the MAGs were presumably from the most abundant  
444 Verrucomicrobia populations, they were not likely soil immigrants due to their high  
445 abundance in the aquatic environment. To confirm their aquatic origin, future experiments  
446 should be designed to test their activities and physiology in the aquatic environment based  
447 on the genomic insights gained in this study.

448

449

## 450 **MATERIALS AND METHODS**

451 **Study sites.** Samples for metagenome sequencing were collected from two temperate lakes  
452 in Wisconsin, USA, Lake Mendota and Trout Bog Lake, during ice-off periods of each year  
453 (May to November). Mendota is an urban eutrophic lake with most of its C being  
454 autochthonous (in-lake produced), whereas Trout Bog is a small, acidic and nutrient-poor  
455 dystrophic lake with mostly terrestrially-derived (allochthonous) C. General lake  
456 characteristics are summarized in **Table 1**.

457

458 **Sampling.** For Mendota, we collected depth-integrated water samples from the surface 12  
459 m (mostly consisting of the epilimnion layer) at 94 time points from 2008 to 2012, and  
460 samples were referred to as “ME” (38). For Trout Bog, we collected the integrated  
461 hypolimnion layer at 45 time points from 2007 to 2009 and the integrated epilimnion layer  
462 at 45 time points from 2007 to 2009, and samples were referred to as “TH” and “TE”,  
463 respectively (37). All samples were filtered through 0.22  $\mu$  m polyethersulfone filters and

464 stored at -80°C until extraction. DNA was extracted from the filters using the FastDNA kit  
465 (MP Biomedicals) according to manufacturer’s instruction with some minor modifications  
466 as described previously (34).

467

468 **Metagenome sequencing, assembly, and draft genome recovery.** Details of  
469 metagenome sequencing, assembly, and binning were described in Bendall *et al.* (37) and  
470 Hamilton *et al.* (61). Briefly, shotgun Illumina HiSeq 2500 metagenome libraries were  
471 constructed for each of the DNA samples. Three combined assemblies were generated by  
472 co-assembling reads from all metagenomes within the ME, TE, and TH groups, respectively.  
473 Binning was conducted on the three combined assemblies to recover “metagenome-  
474 assembled genomes” (MAGs) based on the combination of contig tetranucleotide frequency  
475 and differential coverage patterns across time points using MetaBAT (62). Subsequent  
476 manual curation of MAGs was conducted to remove contigs that did not correlate well with  
477 the median temporal abundance pattern of all contigs within a MAG, as described in  
478 Bendall *et al.* (37).

479

480 **Genome annotation and completeness estimation.** MAGs were submitted to the DOE  
481 Joint Genome Institute’s Integrated Microbial Genome (IMG) database for gene prediction  
482 and function annotation (63). The IMG Taxon Object IDs for Verrucomicrobia MAGs are  
483 listed in **Table 2**. The completeness and contamination of each MAG was estimated using  
484 checkM with both the lineage-specific and Verrucomicrobia-specific workflows (35). The  
485 Verrucomicrobia-specific workflow provided more accurate estimates (i.e. higher genome  
486 completeness and lower contamination) than the lineage-specific workflow when tested on

487 11 complete genomes of Verrucomicrobia isolates available at IMG during our method  
488 validation. We therefore only reported the estimates from Verrucomicrobia-specific  
489 workflow (**Table 2**). MAGs with an estimated completeness lower than 50% were not  
490 included in this study.

491

492 **Taxonomic and phylogenetic analysis.** A total of 19 MAGs were classified to the  
493 Verrucomicrobia phylum based on taxonomic assignment by PhyloSift using 37 conserved  
494 phylogenetic marker genes (64), as described in Bendall *et al.* (37). A phylogenetic tree was  
495 reconstructed from the 19 Verrucomicrobia MAGs and 24 reference genomes using an  
496 alignment concatenated from individual protein alignments of five conserved essential  
497 single-copy genes (represented by TIGR01391, TIGR01011, TIGR00663, TIGR00460, and  
498 TIGR00362) that were recovered in all Verrucomicrobia MAGs. Individual alignments were  
499 first generated with MUSCLE (65), concatenated, and trimmed to exclude columns that  
500 contain gaps for more than 30% of all sequences. A maximum likelihood phylogenetic tree  
501 was constructed using PhyML 3.0 (66), with the LG substitution model and the gamma  
502 distribution parameter estimated by PhyML. Bootstrap values were calculated based on  
503 100 replicates. *Kiritimatiella glycovorans* L21-Fru-AB was used as an outgroup in the  
504 phylogenetic tree. This bacterium was initially designated as the first (and so far the only)  
505 cultured representative of Verrucomicrobia subdivision 5. However, this subdivision was  
506 later proposed as a novel sister phylum associated with Verrucomicrobia (67), making it an  
507 ideal outgroup for this analysis.

508

509 **Estimate of metabolic potential.** IMG provides functional annotation based on KO (KEGG  
510 orthology) term, COG (cluster of orthologous group), pfam, and TIGRfam. To estimate  
511 metabolic potential, we primarily used KO terms due to their direct link to KEGG pathways.  
512 COG, pfam, and TIGRfam were also used when KO terms were not available for a function.  
513 Pathways are primarily reconstructed according to KEGG modules, and MetaCyc pathway is  
514 used if a KEGG module is not available for a pathway. As these MAGs are incomplete  
515 genomes, a fraction of genes in a pathway may be missing due to genome incompleteness.  
516 Therefore, we estimated the completeness of a pathway as the fraction of recovered  
517 enzymes in that pathway (e.g. a pathway is 100% complete if all enzymes in that pathway  
518 are encoded by genes recovered in a MAG). As some genes are shared by multiple  
519 pathways, signature genes specific for a pathway were used to indicate the presence of a  
520 pathway. If signature genes for a pathway were missing in all MAGs, that pathway was  
521 likely absent in all genomes. Based on this, we established criteria for estimating pathway  
522 completeness in each MAG. If a signature gene in a pathway was present, we report the  
523 percentage of genes in the pathway that we found. If a signature gene was absent in a MAG,  
524 but present in at least one third of all MAGs (i.e.  $\geq 7$ ), we still report the pathway  
525 completeness for that MAG in order to account for genome incompleteness. Otherwise, we  
526 considered the pathway to be absent (i.e. completeness is 0%).

527

528 **Glycoside hydrolase identification.** Glycoside hydrolase (GH) genes were identified using  
529 the dbCAN annotation tool (<http://csbl.bmb.uga.edu/dbCAN/annotate.php>) (68) using  
530 HMMER search against hidden Markov models (HMMs) built for all GHs, with an E-value  
531 cutoff of  $1e-7$ , except GH109, for which we found that the HMM used by dbCAN is

532 pfam01408, which is a small domain at the N-terminus of GH109 proteins, but is not  
533 specific for GH109. Therefore, to identify verrucomicrobial GH109, BLASTP was performed  
534 using the two GH109 sequences (GenBank accession ACD03864 and ACD04752) from  
535 verrucomicrobial *Akkermansia muciniphila* ATCC BAA-835 listed in the CAZy database  
536 (<http://www.cazy.org>), with E-value cutoff of 1e-6 and query sequence coverage cutoff of  
537 50%.

538  
539 **Other bioinformatic analyses.** Protein cellular location was predicted using CELLO v.2.5  
540 (<http://cello.life.nctu.edu.tw>) (69) and PSORTb v.3.0 (<http://www.psorth.org/psorthb>) (70).  
541 The beta-barrel structure of outer membrane proteins was predicted by PRED-TMBB  
542 (<http://bioinformatics.biol.uoa.gr//PRED-TMBB>) (71).

543

#### 544 **CONFLICT OF INTEREST**

545 The authors declare no conflict of interest.

546

#### 547 **ACKNOWLEDGEMENTS**

548 We thank the North Temperate Lakes Microbial Observatory 2007-2012 field crews, UW-  
549 Trout Lake Station, the UW Center for Limnology, and the Global Lakes Ecological  
550 Observatory Network for field and logistical support. We give special thanks to past  
551 McMahon lab graduate students Ashley Shade, Ryan Newton, Emily Read, and Lucas  
552 Beversdorf. We acknowledge efforts by many McMahon Lab undergrads and technicians  
553 related to sample collection and DNA extraction, particularly Georgia Wolfe. We personally



554 thank the individual program directors and leadership at the National Science Foundation  
555 for their commitment to continued support of long term ecological research.

556

557 The project was supported by funding from the United States National Science Foundation  
558 Microbial Observatories program (MCB-0702395), the Long Term Ecological Research  
559 program (NTL-LTER DEB-1440297) and an INSPIRE award (DEB-1344254). This material  
560 is also based upon work that supported by the National Institute of Food and Agriculture,  
561 U.S. Department of Agriculture (Hatch Project 1002996). The work conducted by the U.S.  
562 Department of Energy Joint Genome Institute, a DOE Office of Science User Facility, is  
563 supported by the Office of Science of the U.S. Department of Energy under Contract No. DE-  
564 AC02-05CH11231.

565

566

567 **FUNDING INFORMATION**

568 U.S. NSF Microbial Observatories program (MCB-0702395)

569 Katherine D McMahon

570

571 U.S. NSF Long Term Ecological Research program (NTL-LTER DEB-1440297)

572 Katherine D McMahon

573

574 U.S. NSF INSPIRE award (DEB-1344254)

575 Katherine D McMahon

576

577 U.S. National Institute of Food and Agriculture, U.S. Department of Agriculture (Hatch  
578 Project 1002996)

579 Katherine D McMahon

580

581

582 **REFERENCE**

- 583 1. **Zwart G, van Hannen EJ, Kamst-van Agterveld MP, Van der Gucht K, Lindström**  
584 **ES, Van Wichelen J, Lauridsen T, Crump BC, Han S-K, Declerck S.** 2003. Rapid  
585 Screening for Freshwater Bacterial Groups by Using Reverse Line Blot  
586 Hybridization. *Applied and Environmental Microbiology* **69**:5875-5883.
- 587 2. **Newton RJ, Jones SE, Eiler A, McMahon KD, Bertilsson S.** 2011. A Guide to the  
588 Natural History of Freshwater Lake Bacteria. *Microbiology and Molecular Biology*  
589 *Reviews : MMBR* **75**:14-49.
- 590 3. **Eiler A, Bertilsson S.** 2004. Composition of freshwater bacterial communities  
591 associated with cyanobacterial blooms in four Swedish lakes. *Environ Microbiol*  
592 **6**:1228-43.
- 593 4. **Parveen B, Mary I, Vellet A, Ravet V, Debroas D.** 2013. Temporal dynamics and  
594 phylogenetic diversity of free-living and particle-associated Verrucomicrobia  
595 communities in relation to environmental variables in a mesotrophic lake. *FEMS*  
596 *Microbiol Ecol* **83**:189-201.
- 597 5. **Arnds J, Knittel K, Buck U, Winkel M, Amann R.** 2010. Development of a 16S  
598 rRNA-targeted probe set for Verrucomicrobia and its application for fluorescence in  
599 situ hybridization in a humic lake. *Syst Appl Microbiol* **33**:139-48.
- 600 6. **Hedlund BP, Gosink JJ, Staley JT.** 1997. Verrucomicrobia div. nov., a new division  
601 of the bacteria containing three new species of Prostheco bacter. *Antonie van*  
602 *Leeuwenhoek* **72**:29-38.
- 603 7. **Yoon J, Yasumoto-Hirose M, Katsuta A, Sekiguchi H, Matsuda S, Kasai H, Yokota**  
604 **A.** 2007. Coraliomargarita akajimensis gen. nov., sp. nov., a novel member of the  
605 phylum 'Verrucomicrobia' isolated from seawater in Japan. *Int J Syst Evol Microbiol*  
606 **57**:959-63.
- 607 8. **Yoon J, Matsuo Y, Katsuta A, Jang JH, Matsuda S, Adachi K, Kasai H, Yokota A.**  
608 2008. Haloferula rosea gen. nov., sp. nov., Haloferula harenae sp. nov., Haloferula  
609 phyci sp. nov., Haloferula helveola sp. nov. and Haloferula sargassicola sp. nov., five  
610 marine representatives of the family Verrucomicrobiaceae within the phylum  
611 'Verrucomicrobia'. *Int J Syst Evol Microbiol* **58**:2491-500.
- 612 9. **Sangwan P, Kovac S, Davis KE, Sait M, Janssen PH.** 2005. Detection and cultivation  
613 of soil verrucomicrobia. *Appl Environ Microbiol* **71**:8402-10.
- 614 10. **Brewer TE, Handley KM, Carini P, Gilbert JA, Fierer N.** 2016. Genome reduction  
615 in an abundant and ubiquitous soil bacterium 'Candidatus Udaeobacter copiosus'.  
616 **2**:16198.
- 617 11. **Qiu YL, Kuang XZ, Shi XS, Yuan XZ, Guo RB.** 2014. Terrimicrobium sacchariphilum  
618 gen. nov., sp. nov., an anaerobic bacterium of the class 'Spartobacteria' in the phylum  
619 Verrucomicrobia, isolated from a rice paddy field. *Int J Syst Evol Microbiol* **64**:1718-  
620 23.
- 621 12. **da Rocha UN, van Elsas JD, van Overbeek LS.** 2010. Real-time PCR detection of  
622 Holophagae (Acidobacteria) and Verrucomicrobia subdivision 1 groups in bulk and  
623 leek (Allium porrum) rhizosphere soils. *Journal of Microbiological Methods* **83**:141-  
624 148.

- 625 13. **Wertz JT, Kim E, Breznak JA, Schmidt TM, Rodrigues JLM.** 2012. Genomic and  
626 Physiological Characterization of the Verrucomicrobia Isolate *Diplosphaera*  
627 *colitermitum* gen. nov., sp. nov., Reveals Microaerophily and Nitrogen Fixation  
628 Genes. *Applied and Environmental Microbiology* **78**:1544-1555.
- 629 14. **Derrien M, Vaughan EE, Plugge CM, de Vos WM.** 2004. *Akkermansia muciniphila*  
630 gen. nov., sp. nov., a human intestinal mucin-degrading bacterium. *Int J Syst Evol*  
631 *Microbiol* **54**:1469-76.
- 632 15. **Scheuermayer M, Gulder TA, Bringmann G, Hentschel U.** 2006. *Rubritalea*  
633 *marina* gen. nov., sp. nov., a marine representative of the phylum 'Verrucomicrobia',  
634 isolated from a sponge (Porifera). *Int J Syst Evol Microbiol* **56**:2119-24.
- 635 16. **Chin KJ, Liesack W, Janssen PH.** 2001. *Opiritatus terrae* gen. nov., sp. nov., to  
636 accommodate novel strains of the division 'Verrucomicrobia' isolated from rice  
637 paddy soil. *Int J Syst Evol Microbiol* **51**:1965-8.
- 638 17. **Otsuka S, Suenaga T, Vu HT, Ueda H, Yokota A, Senoo K.** 2013. *Brevifollis*  
639 *gellanilyticus* gen. nov., sp. nov., a gellan-gum-degrading bacterium of the phylum  
640 Verrucomicrobia. *Int J Syst Evol Microbiol* **63**:3075-8.
- 641 18. **Sangwan P, Chen X, Hugenholtz P, Janssen PH.** 2004. *Chthoniobacter flavus* gen.  
642 nov., sp. nov., the first pure-culture representative of subdivision two,  
643 *Spartobacteria classis* nov., of the phylum Verrucomicrobia. *Appl Environ Microbiol*  
644 **70**:5875-81.
- 645 19. **Hedlund BP, Gosink JJ, Staley JT.** 1996. Phylogeny of *Prostheco bacter*, the fusiform  
646 caulobacters: members of a recently discovered division of the bacteria. *Int J Syst*  
647 *Bacteriol* **46**:960-6.
- 648 20. **Otsuka S, Ueda H, Suenaga T, Uchino Y, Hamada M, Yokota A, Senoo K.** 2013.  
649 *Roseimicrobium gellanilyticum* gen. nov., sp. nov., a new member of the class  
650 Verrucomicrobiae. *Int J Syst Evol Microbiol* **63**:1982-6.
- 651 21. **Pol A, Heijmans K, Harhangi HR, Tedesco D, Jetten MS, Op den Camp HJ.** 2007.  
652 Methanotrophy below pH 1 by a new Verrucomicrobia species. *Nature* **450**:874-8.
- 653 22. **Freitas S, Hatosy S, Fuhrman JA, Huse SM, Welch DB, Sogin ML, Martiny AC.**  
654 2012. Global distribution and diversity of marine Verrucomicrobia. *ISME J* **6**:1499-  
655 505.
- 656 23. **Cardman Z, Arnosti C, Durbin A, Ziervogel K, Cox C, Steen AD, Teske A.** 2014.  
657 Verrucomicrobia are candidates for polysaccharide-degrading bacterioplankton in  
658 an arctic fjord of Svalbard. *Appl Environ Microbiol* **80**:3749-56.
- 659 24. **Martinez-Garcia M, Brazel DM, Swan BK, Arnosti C, Chain PS, Reitenga KG, Xie**  
660 **G, Poulton NJ, Lluesma Gomez M, Masland DE, Thompson B, Bellows WK,**  
661 **Ziervogel K, Lo CC, Ahmed S, Gleasner CD, Detter CJ, Stepanauskas R.** 2012.  
662 Capturing single cell genomes of active polysaccharide degraders: an unexpected  
663 contribution of Verrucomicrobia. *PLoS One* **7**:e35314.
- 664 25. **Herlemann DP, Lundin D, Labrenz M, Jurgens K, Zheng Z, Aspeborg H,**  
665 **Andersson AF.** 2013. Metagenomic de novo assembly of an aquatic representative  
666 of the verrucomicrobial class *Spartobacteria*. *MBio* **4**:e00569-12.
- 667 26. **Paver SF, Kent AD.** 2010. Temporal patterns in glycolate-utilizing bacterial  
668 community composition correlate with phytoplankton population dynamics in  
669 humic lakes. *Microb Ecol* **60**:406-18.

- 670 27. **Haukka K, Kolmonen E, Hyder R, Hietala J, Vakkilainen K, Kairesalo T, Haario**  
671 **H, Sivonen K.** 2006. Effect of nutrient loading on bacterioplankton community  
672 composition in lake mesocosms. *Microb Ecol* **51**:137-46.
- 673 28. **Lindström ES, Vrede K, Leskinen E.** 2004. Response of a member of the  
674 Verrucomicrobia, among the dominating bacteria in a hypolimnion, to increased  
675 phosphorus availability. *Journal of Plankton Research* **26**:241-246.
- 676 29. **Kolmonen E, Sivonen K, Rapala J, Haukka K.** 2004. Diversity of cyanobacteria and  
677 heterotrophic bacteria in cyanobacterial blooms in Lake Joutikas, Finland. *Aquatic*  
678 *Microbial Ecology* **36**:201-211.
- 679 30. **Lindström ES, Kamst-Van Agterveld MP, Zwart G.** 2005. Distribution of Typical  
680 Freshwater Bacterial Groups Is Associated with pH, Temperature, and Lake Water  
681 Retention Time. *Applied and Environmental Microbiology* **71**:8201-8206.
- 682 31. **Schlesner H.** 1987. *Verrucomicrobium spinosum* gen. nov., sp. nov.: a fimbriated  
683 prosthecate bacterium. *Systematic and applied microbiology* **10**:54-56.
- 684 32. **Zwart G, Huismans R, van Agterveld MP, Van de Peer Y, De Rijk P, Eenhoorn H,**  
685 **Muyzer G, van Hannen EJ, Gons HJ, Laanbroek HJ.** 1998. Divergent members of  
686 the bacterial division Verrucomicrobiales in a temperate freshwater lake. *FEMS*  
687 *Microbiology Ecology* **25**:159-169.
- 688 33. **Read JS, Rose KC.** 2013. Physical responses of small temperate lakes to variation in  
689 dissolved organic carbon concentrations. *Limnology and Oceanography* **58**:921-931.
- 690 34. **Shade A, Jones SE, McMahon KD.** 2008. The influence of habitat heterogeneity on  
691 freshwater bacterial community composition and dynamics. *Environmental*  
692 *Microbiology* **10**:1057-1067.
- 693 35. **Parks DH, Imelfort M, Skennerton CT, Hugenholtz P, Tyson GW.** 2015. CheckM:  
694 assessing the quality of microbial genomes recovered from isolates, single cells, and  
695 metagenomes. *Genome Res* **25**:1043-55.
- 696 36. **Schlesner H, Jenkins C, Staley J.** 2006. The Phylum Verrucomicrobia: A  
697 Phylogenetically Heterogeneous Bacterial Group, p 881-896. *In* Dworkin M, Falkow  
698 S, Rosenberg E, Schleifer K-H, Stackebrandt E (ed), *The Prokaryotes* doi:10.1007/0-  
699 387-30747-8\_37. Springer New York.
- 700 37. **Bendall ML, Stevens SLR, Chan L-K, Malfatti S, Schwientek P, Tremblay J,**  
701 **Schackwitz W, Martin J, Pati A, Bushnell B, Froula J, Kang D, Tringe SG,**  
702 **Bertilsson S, Moran MA, Shade A, Newton RJ, McMahon KD, Malmstrom RR.**  
703 2016. Genome-wide selective sweeps and gene-specific sweeps in natural bacterial  
704 populations. *ISME J* doi:10.1038/ismej.2015.241.
- 705 38. **Garcia SL, Stevens SLR, Crary B, Martinez-Garcia M, Stepanauskas R, Woyke T,**  
706 **Tringe SG, Andersson S, Bertilsson S, Malmstrom RR, McMahon KD.** 2016.  
707 Contrasting patterns of genome-level diversity across distinct co-occurring bacterial  
708 populations. *bioRxiv* doi:10.1101/080168.
- 709 39. **Shieh WY, Jean WD.** 1998. *Alterococcus agarolyticus*, gen.nov., sp.nov., a halophilic  
710 thermophilic bacterium capable of agar degradation. *Can J Microbiol* **44**:637-45.
- 711 40. **Kent AD, Jones SE, Yannarell AC, Graham JM, Lauster GH, Kratz TK, Triplett EW.**  
712 2004. Annual Patterns in Bacterioplankton Community Variability in a Humic Lake.  
713 *Microbial Ecology* **48**:550-560.
- 714 41. **Kent AD, Yannarell AC, Rusak JA, Triplett EW, McMahon KD.** 2007. Synchrony in  
715 aquatic microbial community dynamics. *ISME J* **1**:38-47.

- 716 42. **Erbilgin O, McDonald KL, Kerfeld CA.** 2014. Characterization of a planctomycetal  
717 organelle: a novel bacterial microcompartment for the aerobic degradation of plant  
718 saccharides. *Appl Environ Microbiol* **80**:2193-205.
- 719 43. **Blanvillain S, Meyer D, Boulanger A, Lautier M, Guynet C, Denance N, Vasse J,**  
720 **Lauber E, Arlat M.** 2007. Plant carbohydrate scavenging through tonB-dependent  
721 receptors: a feature shared by phytopathogenic and aquatic bacteria. *PLoS One*  
722 **2**:e224.
- 723 44. **Jiao G, Yu G, Zhang J, Ewart HS.** 2011. Chemical structures and bioactivities of  
724 sulfated polysaccharides from marine algae. *Mar Drugs* **9**:196-223.
- 725 45. **Filali Mouhim R, Cornet J-F, Fontane T, Fournet B, Dubertret G.** 1993.  
726 Production, isolation and preliminary characterization of the exopolysaccharide of  
727 the cyanobacterium *Spirulina platensis*. *Biotechnology Letters* **15**:567-572.
- 728 46. **Dantas-Santos N, Gomes DL, Costa LS, Cordeiro SL, Costa MS, Trindade ES,**  
729 **Franco CR, Scortecci KC, Leite EL, Rocha HA.** 2012. Freshwater plants synthesize  
730 sulfated polysaccharides: heterogalactans from Water Hyacinth (*Eicchornia*  
731 *crassipes*). *Int J Mol Sci* **13**:961-76.
- 732 47. **Beverdorf LJ, Miller TR, McMahon KD.** 2013. The role of nitrogen fixation in  
733 cyanobacterial bloom toxicity in a temperate, eutrophic lake. *PLoS One* **8**:e56103.
- 734 48. **Khadem AF, van Teeseling MC, van Niftrik L, Jetten MS, Op den Camp HJ, Pol A.**  
735 2012. Genomic and Physiological Analysis of Carbon Storage in the  
736 Verrucomicrobial Methanotroph "*Ca. Methylacidiphilum Fumariolicum*" SolV. *Front*  
737 *Microbiol* **3**:345.
- 738 49. **Mehta T, Coppi MV, Childers SE, Lovley DR.** 2005. Outer membrane c-type  
739 cytochromes required for Fe(III) and Mn(IV) oxide reduction in *Geobacter*  
740 *sulfurreducens*. *Appl Environ Microbiol* **71**:8634-41.
- 741 50. **Liu Y, Wang Z, Liu J, Levar C, Edwards MJ, Babauta JT, Kennedy DW, Shi Z,**  
742 **Beyenal H, Bond DR, Clarke TA, Butt JN, Richardson DJ, Rosso KM, Zachara JM,**  
743 **Fredrickson JK, Shi L.** 2014. A trans-outer membrane porin-cytochrome protein  
744 complex for extracellular electron transfer by *Geobacter sulfurreducens* PCA.  
745 *Environmental Microbiology Reports* **6**:776-785.
- 746 51. **Shi L, Fredrickson JK, Zachara JM.** 2014. Genomic analyses of bacterial porin-  
747 cytochrome gene clusters. *Frontiers in Microbiology* **5**:657.
- 748 52. **Bucking C, Piepenbrock A, Kappler A, Gescher J.** 2012. Outer-membrane  
749 cytochrome-independent reduction of extracellular electron acceptors in  
750 *Shewanella oneidensis*. *Microbiology* **158**:2144-57.
- 751 53. **Shyu JBH, Lies DP, Newman DK.** 2002. Protective Role of tolC in Efflux of the  
752 Electron Shuttle Anthraquinone-2,6-Disulfonate. *Journal of Bacteriology* **184**:1806-  
753 1810.
- 754 54. **Voordeckers JW, Kim BC, Izallalen M, Lovley DR.** 2010. Role of *Geobacter*  
755 *sulfurreducens* outer surface c-type cytochromes in reduction of soil humic acid and  
756 anthraquinone-2,6-disulfonate. *Appl Environ Microbiol* **76**:2371-5.
- 757 55. **Lovley DR, Blunt-Harris EL.** 1999. Role of humic-bound iron as an electron  
758 transfer agent in dissimilatory Fe(III) reduction. *Appl Environ Microbiol* **65**:4252-4.
- 759 56. **Lovley DR, Coates JD, Blunt-Harris EL, Phillips EJP, Woodward JC.** 1996. Humic  
760 substances as electron acceptors for microbial respiration. *Nature* **382**:445-448.

- 761 57. **Klupfel L, Piepenbrock A, Kappler A, Sander M.** 2014. Humic substances as fully  
762 regenerable electron acceptors in recurrently anoxic environments. *Nature Geosci*  
763 **7**:195-200.
- 764 58. **Studholme DJ, Fuerst JA, Bateman A.** 2004. Novel protein domains and motifs in  
765 the marine planctomycete *Rhodopirellula baltica*. *FEMS Microbiol Lett* **236**:333-40.
- 766 59. **Kamneva OK, Knight SJ, Liberles DA, Ward NL.** 2012. Analysis of genome content  
767 evolution in pvc bacterial super-phylum: assessment of candidate genes associated  
768 with cellular organization and lifestyle. *Genome Biol Evol* **4**:1375-90.
- 769 60. **Linz AM, Crary BC, Shade A, Owens S, Gilbert JA, Knight R, McMahon KD.** 2017.  
770 Bacterial Community Composition and Dynamics Spanning Five Years in Freshwater  
771 Bog Lakes. *mSphere* **2**.
- 772 61. **Hamilton JJ, Garcia SL, Brown BS, Oyserman BO, Moya-Flores F, Bertilsson S,**  
773 **Malmstrom RR, Forest KT, McMahon KD.** 2007. High-Throughput Metabolic  
774 Network Analysis and Metatranscriptomics of a Cosmopolitan and Streamlined  
775 Freshwater Lineage. *bioRxiv* doi:10.1101/106856.
- 776 62. **Kang DD, Froula J, Egan R, Wang Z.** 2015. MetaBAT, an efficient tool for accurately  
777 reconstructing single genomes from complex microbial communities. *PeerJ* **3**:e1165.
- 778 63. **Markowitz VM, Chen I-MA, Palaniappan K, Chu K, Szeto E, Pillay M, Ratner A,**  
779 **Huang J, Woyke T, Huntemann M, Anderson I, Billis K, Varghese N, Mavromatis**  
780 **K, Pati A, Ivanova NN, Kyrpides NC.** 2013. IMG 4 version of the integrated  
781 microbial genomes comparative analysis system. *Nucleic Acids Research*  
782 doi:10.1093/nar/gkt963.
- 783 64. **Darling AE, Jospin G, Lowe E, Matsen IV FA, Bik HM, Eisen JA.** 2014. PhyloSift:  
784 phylogenetic analysis of genomes and metagenomes. *PeerJ* **2**:e243.
- 785 65. **Edgar RC.** 2004. MUSCLE: a multiple sequence alignment method with reduced time  
786 and space complexity. *BMC Bioinformatics* **5**:113-113.
- 787 66. **Guindon S, Dufayard JF, Lefort V, Anisimova M, Hordijk W, Gascuel O.** 2010.  
788 New algorithms and methods to estimate maximum-likelihood phylogenies:  
789 assessing the performance of PhyML 3.0. *Syst Biol* **59**:307-21.
- 790 67. **Spring S, Bunk B, Sproer C, Schumann P, Rohde M, Tindall BJ, Klenk HP.** 2016.  
791 Characterization of the first cultured representative of Verrucomicrobia subdivision  
792 5 indicates the proposal of a novel phylum. *ISME J* **10**:2801-2816.
- 793 68. **Yin Y, Mao X, Yang J, Chen X, Mao F, Xu Y.** 2012. dbCAN: a web resource for  
794 automated carbohydrate-active enzyme annotation. *Nucleic Acids Res* **40**:W445-51.
- 795 69. **Yu CS, Chen YC, Lu CH, Hwang JK.** 2006. Prediction of protein subcellular  
796 localization. *Proteins* **64**:643-51.
- 797 70. **Yu NY, Wagner JR, Laird MR, Melli G, Rey S, Lo R, Dao P, Sahinalp SC, Ester M,**  
798 **Foster LJ, Brinkman FSL.** 2010. PSORTb 3.0: improved protein subcellular  
799 localization prediction with refined localization subcategories and predictive  
800 capabilities for all prokaryotes. *Bioinformatics* **26**:1608-1615.
- 801 71. **Bagos PG, Liakopoulos TD, Spyropoulos IC, Hamodrakas SJ.** 2004. PRED-TMBB:  
802 a web server for predicting the topology of beta-barrel outer membrane proteins.  
803 *Nucleic Acids Res* **32**:W400-4.  
804  
805

806

## 807 **FIGURE LEGENDS**

808 **Fig. 1.** Phylogenetic tree constructed with a concatenated alignment of protein sequences  
809 from five conserved essential single-copy genes (represented by TIGR01391, TIGR01011,  
810 TIGR00663, TIGR00460, and TIGR00362) that were recovered in all Verrucomicrobia  
811 MAGs. ME, TE and TH MAGs are labeled with red, green and blue, respectively. Genome ID  
812 in IMG or NCBI is indicated in the bracket. The outgroup is *Kiritimatiella glycovorans* L21-  
813 Fru-AB, which was initially assigned to subdivision 5, but this subdivision was recently  
814 proposed as a novel sister phylum to Verrucomicrobia (67).

815

816 **Fig. 2. A.** Coding densities of glycoside hydrolase genes, **B.** sulfatase genes, and **C.**  
817 Planctomycete-specific cytochrome *c* (PSCyt)-containing genes. Data from ME, TE and TH  
818 MAGs are labeled with red, green and blue, respectively. The three plots share the same *x*-  
819 axis label as indicated by the genome clustering on the top, which is based on a subtree  
820 extracted from the phylogenetic tree in Fig. 1 to indicate the phylogenetic relatedness of  
821 the 19 MAGs. The vertical dashed lines divide these MAGs to different subdivisions.

822

823

824 **Fig. 3.** Gene counts for the top 10 most abundant GH families, total gene counts for all GH  
825 families, and the number of GH families represented by these genes. MAGs are ordered as  
826 in the clustering in Fig. 2.

827

828 **Fig. 4.** Gene clusters encoding bacterial microcompartments (BMCs) involved in L-fucose  
829 and L-rhamnose degradation. The vertical line indicates the end of a contig, and IMG gene  
830 locus tag for the first gene in each presented gene cluster is indicated in the parentheses.  
831 The BMC is schematically represented by a hexagon with the two building blocks labeled in  
832 red and green, respectively. The two building blocks and reactions inside the BMC are  
833 colored according to their encoding genes' color labels on the left side.

834

835 **Fig. 5.** Gene clusters encoding putative tonB-dependent carbohydrate utilization (CUT) loci.  
836 IMG gene locus tag for the first gene in each presented gene cluster is indicated in the  
837 parentheses. The horizontal solid lines below genes indicate predicted extracellular or  
838 outer membrane proteins.

839

840 **Fig. 6.** Completeness estimates of key metabolic pathways. MAGs are ordered as in the  
841 clustering in Fig. 2. Completeness value of "1" indicates a pathway is complete; "0" indicates  
842 no genes were found in that pathway; and "(0)" indicates that although some genes in a  
843 pathway are present, the pathway is likely absent because signature genes for that pathway  
844 were not found in that draft genome AND signature genes are missing in more than two  
845 thirds of all draft genomes.

846

847 **Fig. 7.** Gene clusters encoding putative porin-multiheme cytochrome *c* complex (PCC). IMG  
848 gene locus tag for the first gene in each presented gene cluster is indicated in the  
849 parentheses. The vertical line indicates the end of a contig, and horizontal lines below  
850 genes indicate predicted cellular locations of their encoded proteins. These putative PCC



851 genes are in 18.1, 9.0, 6.1, 18.4, 70.0, 10.6 and 10.8 kbp long contigs, respectively. A  
852 hypothesized model of extracellular electron transfer is shown on the right with yellow  
853 arrows indicating electron flows. “IM” and “OM” refer to inner and outer membranes,  
854 respectively, “ET in IM” refers to electron transfer in the inner membrane, and “EA<sub>(ox)</sub>” and  
855 “EA<sub>(red)</sub>” refer to oxidized and reduced forms of the electron acceptor, respectively.

856

857 **Fig. 8.** Domain architecture and occurrence of PSCyt-containing genes. Based on the  
858 combination of specific PSCyt and PSD domains, these domain structures can be classified  
859 into three groups (I, II, and III). “CBM” refers to carbohydrate-binding modules, which  
860 include pfam13385 (Laminin\_G\_3), pfam08531 (Bac\_rhamnosid\_N), pfam08305 (NPCBM),  
861 pfam03422 (CBM\_6), and pfam07691 (PA14). “PPI” refers to protein-protein interaction  
862 domains, which include pfam02368 (Big\_2), pfam00400 (WD40), and pfam00754  
863 (F5\_F8\_type\_C).

864

865

## 866 **LIST OF SUPPLEMENTARY MATERIAL**

867 **Supplementary Text**

868 **Supplementary Figures S1 through S8**

869

870 **Supplementary Figure Legends**

871 **Fig. S1.** A tiled display of an emergent self-organizing map (ESOM) based on the  
872 tetranucleotide frequency (TNF) of the 19 Verrucomicrobia MAGs. TNF was calculated with  
873 a window size of 5 kbp, with each dot on the ESOM representing a 5-kbp fragment (or a

874 contig if its length is shorter than 5 kbp). Dots (i.e. fragments) are colored according to  
875 MAGs. A numeric ID is assigned to each MAG, and IDs from Mendota are labeled in black  
876 and IDs from Trout Bog labeled in white. A red outline was drawn to indicate the clustering  
877 of MAGs from Mendota on the ESOM.

878

879 **Fig. S2.** Counts of GH genes among the 78 different GH families present in MAGs.

880

881 **Fig. S3.** Heat map based on GH abundance profile patterns showing the clustering of MAGs  
882 by different lakes.

883

884 **Fig. S4.** Counts of carbohydrate and amino acid transporter genes.

885

886 **Fig. S5.** Comparison of glycolate oxidase gene operons in *E. coli*, *C. flavus* and TE4605.

887

888 **Fig. S6.** Summary of important metabolic genes and pathways.

889

890 **Fig. S7.** Occurrence and gene organization of Planctomycetes-specific domains, DUF1501,  
891 and DUF1552. **(a)** Counts of PSCyt, PSD, DUF1501, and DUF1552 domains in the MAGs. **(b)**  
892 Clustering of PUF1501- and PSCyt2-containing genes, and clustering of PUF1552- and  
893 PSCyt3-containing genes in the genome.

894

895

**TABLE 1. Lakes included in this study<sup>a</sup>**

| <b>Lake</b>           | <b>Mendota</b>     | <b>Trout Bog</b>      |
|-----------------------|--------------------|-----------------------|
| GPS location          | 43.100°N, 89.405°W | 46.041°N, 89.686°W    |
| Lake type             | Drainage lake      | Seepage lake          |
| Surface area (ha)     | 3938               | 1.1                   |
| Mean depth (m)        | 12.8               | 5.6                   |
| Max depth (m)         | 25.3               | 7.9                   |
| pH                    | 8.3                | 5.2                   |
| Primary carbon source | Phytoplankton      | Terrestrial subsidies |
| DOC (mg/L)            | 5.0                | 20.0                  |
| Total N (mg/L)        | 1.5                | 1.3                   |
| Total P (µg/L)        | 131                | 71                    |
| DOC/N                 | 3.3                | 15.6                  |
| DOC/P                 | 38.0               | 281.9                 |
| Trophic state         | Eutrophic          | Dystrophic            |

896 <sup>a</sup>Data from NTL-LTER <https://lter.limnology.wisc.edu>, averaged from the study years. DOC = Dissolved  
897 organic carbon. N = Nitrogen. P = Phosphorus.

898

899

900

**TABLE 2. Summary of Verrucomicrobia MAGs<sup>a</sup>**

| Genome  | IMG Taxon<br>OID | Subdivision  | Recovered<br>MAG Size<br>(Mbp) <sup>b</sup> | Genome<br>Completeness<br>Estimate<br>(%) <sup>c</sup> | Genome<br>Contamination<br>Estimate<br>(%) <sup>c</sup> | GC<br>Content<br>(%) | Coding<br>Base<br>(%) | Gene<br>Count | Normalized Coverage Depth <sup>d</sup> |      |                                    |
|---------|------------------|--------------|---------------------------------------------|--------------------------------------------------------|---------------------------------------------------------|----------------------|-----------------------|---------------|----------------------------------------|------|------------------------------------|
|         |                  |              |                                             |                                                        |                                                         |                      |                       |               | Median                                 | Mean | Coefficient<br>of Variation<br>(%) |
| ME3880  | 2582580573       | 1            | 1.6                                         | 70                                                     | 2                                                       | 58                   | 90.9                  | 1585          | 0.2                                    | 2.9  | 217                                |
| TH2746  | 2582580664       | 1            | 6.5                                         | 81                                                     | 3                                                       | 62                   | 86.7                  | 5430          | 3.3                                    | 4.7  | 82                                 |
| ME12612 | 2582580523       | 1            | 2.2                                         | 79                                                     | 3                                                       | 59                   | 89.0                  | 2335          | 0.0                                    | 0.9  | 261                                |
| ME12173 | 2582580521       | 1            | 2.1                                         | 63                                                     | 3                                                       | 52                   | 91.3                  | 2070          | 0.0                                    | 0.8  | 583                                |
| TE4605  | 2582580638       | 1            | 4.7                                         | 91                                                     | 0                                                       | 59                   | 91.1                  | 4380          | 1.0                                    | 4.8  | 198                                |
| ME6381  | 2582580593       | 1            | 2.4                                         | 62                                                     | 0                                                       | 57                   | 92.5                  | 2221          | 0.0                                    | 0.4  | 285                                |
| ME8366  | 2582580607       | 2            | 3.6                                         | 87                                                     | 5                                                       | 63                   | 87.4                  | 3450          | 0.0                                    | 1.2  | 326                                |
| TH2747  | 2582580665       | 3            | 5.2                                         | 93                                                     | 8                                                       | 58                   | 89.6                  | 4846          | 1.8                                    | 2.8  | 99                                 |
| TH3004  | 2582580668       | 3            | 4.5                                         | 93                                                     | 6                                                       | 57                   | 91.4                  | 3798          | 1.9                                    | 5.8  | 139                                |
| TH0989  | 2556921153       | 3            | 7.2                                         | 91                                                     | 8                                                       | 62                   | 90.3                  | 5583          | 6.1                                    | 6.3  | 61                                 |
| TH2519  | 2593339181       | 4            | 1.8                                         | 69                                                     | 2                                                       | 42                   | 94.3                  | 1654          | 6.2                                    | 6.7  | 60                                 |
| TE1800  | 2593339189       | 4            | 2.2                                         | 84                                                     | 2                                                       | 42                   | 94.3                  | 1998          | 10.8                                   | 11.3 | 77                                 |
| TH4590  | 2582580688       | 4            | 3.3                                         | 87                                                     | 1                                                       | 65                   | 90.7                  | 3132          | 2.4                                    | 3.6  | 99                                 |
| ME2014  | 2582580546       | 4            | 1.9                                         | 77                                                     | 5                                                       | 66                   | 93.7                  | 1700          | 1.0                                    | 3.3  | 174                                |
| ME12657 | 2582580524       | 4            | 1.9                                         | 81                                                     | 7                                                       | 68                   | 94.0                  | 1838          | 0.0                                    | 0.8  | 344                                |
| TE1301  | 2582580616       | 4            | 2.0                                         | 95                                                     | 0                                                       | 54                   | 94.7                  | 1943          | 4.1                                    | 14.2 | 187                                |
| TH4093  | 2582580682       | Unclassified | 4.7                                         | 77                                                     | 6                                                       | 48                   | 86.5                  | 3982          | 4.3                                    | 3.9  | 61                                 |
| ME30509 | 2582580559       | Unclassified | 1.2                                         | 51                                                     | 2                                                       | 63                   | 92.3                  | 1160          | 0.0                                    | 0.5  | 479                                |
| TH4820  | 2582580691       | Unclassified | 3.0                                         | 56                                                     | 3                                                       | 63                   | 86.7                  | 2794          | 1.0                                    | 2.1  | 110                                |

<sup>a</sup>MAGs from Lake Mendota are shaded.

<sup>b</sup>Recovered MAG size is the sum of the length of all contigs within a MAG.

<sup>c</sup>Genome completeness and contamination was estimated with checkM using Verrucomicrobia-specific marker gene sets.

<sup>d</sup>Normalized coverage depths of MAGs were calculated from the 94, 45, or 45 individual ME, TE, or TH metagenomes respectively, and were used to comparatively infer relative population abundance at the different sampling points. In addition to the median and mean coverage depths, the coefficient of variation is also shown to indicate variation among the sampling points.

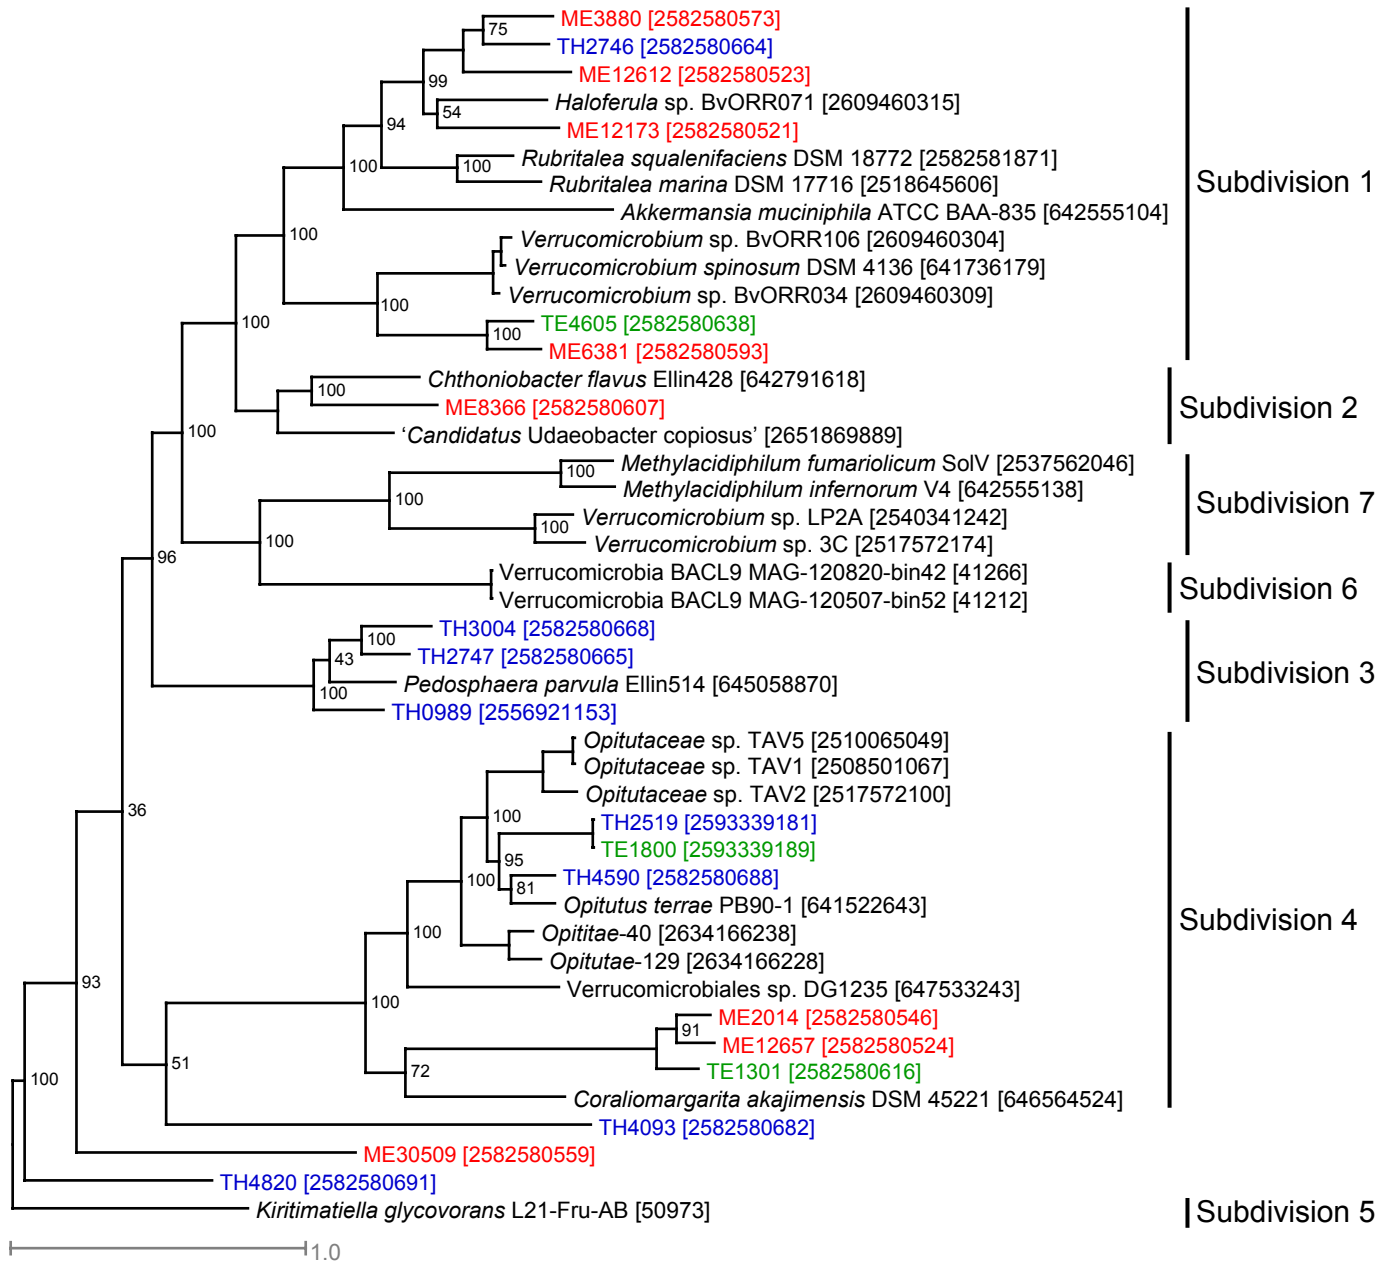

**Fig. 1.** Phylogenetic tree constructed with a concatenated alignment of protein sequences from five conserved essential single-copy genes (represented by TIGR01391, TIGR01011, TIGR00663, TIGR00460, and TIGR00362) that were recovered in all Verrucomicrobia MAGs. ME, TE and TH MAGs are labeled with red, green and blue, respectively. Genome ID in IMG or NCBI is indicated in the bracket. The outgroup is *Kiritimatiella glycovorans* L21-Fru-AB, which was initially assigned to subdivision 5, but this subdivision was recently proposed as a novel sister phylum to Verrucomicrobia (67).

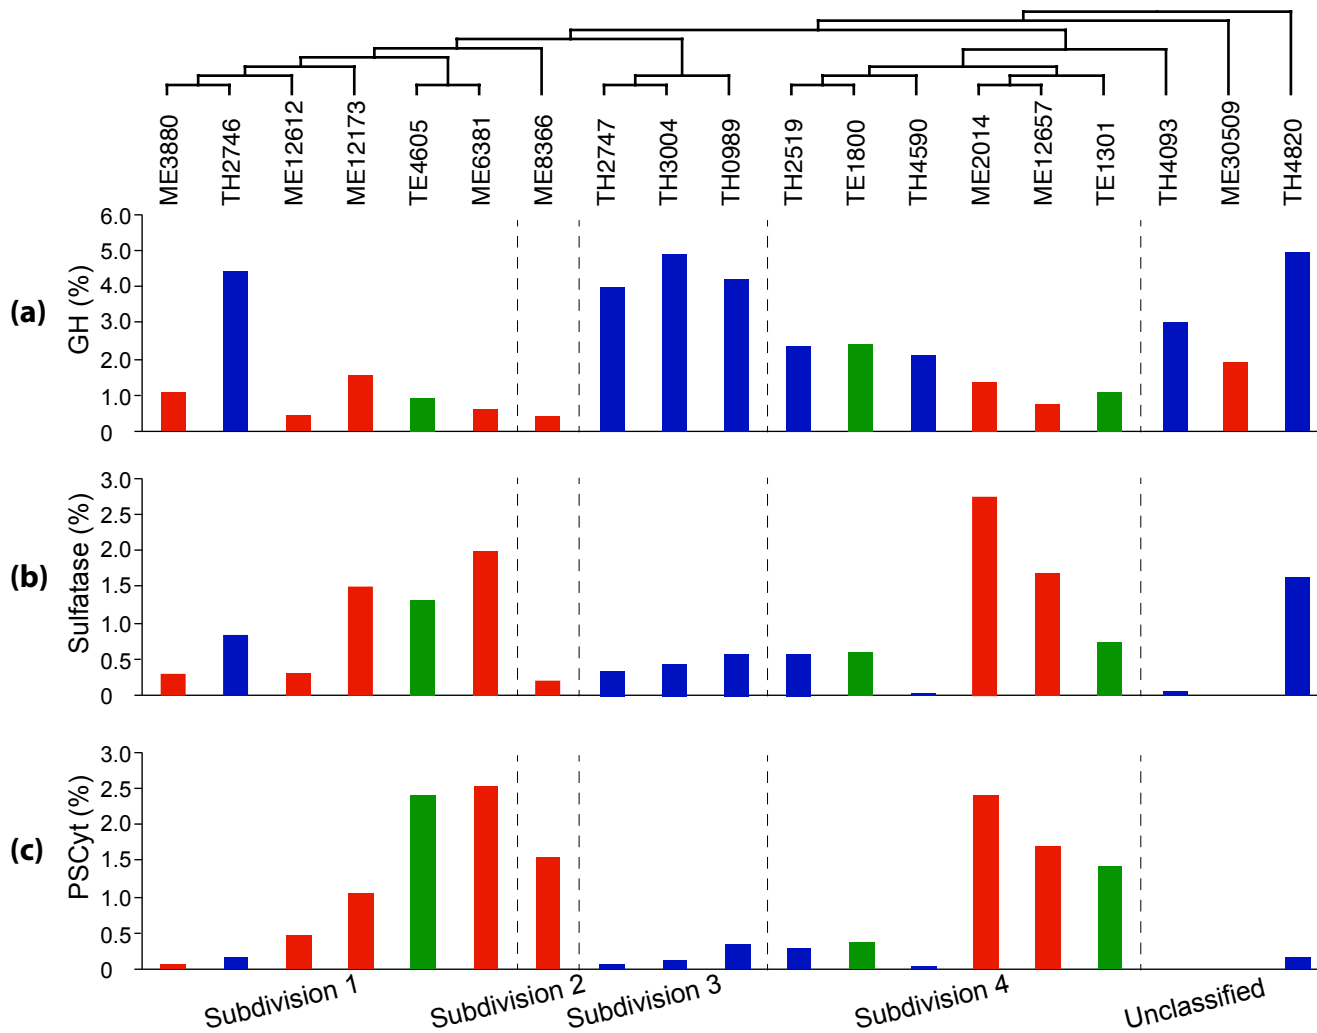

**Fig. 2.** Coding densities of glycoside hydrolase genes (a), sulfatase genes (b) and Planctomycete-specific cytochrome c (PSCyt)-containing genes (c). Data from ME, TE and TH MAGs are labeled with red, green and blue, respectively. The three plots share the same x-axis label indicated by the genome clustering on the top, which is based on a subtree extracted from the phylogenetic tree in Fig. 1 to indicate the phylogenetic relatedness of the 19 MAGs. The vertical dashed lines divide these MAGs to different subdivisions.

| GH                                             | Main Activities                                                                          | ME3880    | TH2746                | ME12612   | ME12173   | TE4605    | ME6381    | ME8366    | TH2747     | TH3004     | TH0989     | TH2519    | TE1800    | TH4590    | ME2014    | ME12657   | TE1301    | TH4093     | ME30509   | TH4820     |
|------------------------------------------------|------------------------------------------------------------------------------------------|-----------|-----------------------|-----------|-----------|-----------|-----------|-----------|------------|------------|------------|-----------|-----------|-----------|-----------|-----------|-----------|------------|-----------|------------|
|                                                |                                                                                          | GH29      | $\alpha$ -fucosidases | 2         | 22        | 0         | 1         | 0         | 0          | 0          | 17         | 19        | 24        | 4         | 5         | 6         | 0         | 0          | 0         | 14         |
| GH2                                            | $\beta$ -galactosidases and other $\beta$ -linked dimers                                 | 1         | 24                    | 0         | 1         | 2         | 0         | 0         | 18         | 14         | 20         | 5         | 5         | 5         | 0         | 0         | 0         | 6          | 2         | 7          |
| GH78                                           | $\alpha$ -L-rhamnosidases                                                                | 1         | 31                    | 0         | 2         | 0         | 0         | 0         | 11         | 11         | 13         | 3         | 5         | 9         | 0         | 0         | 0         | 5          | 2         | 7          |
| GH95                                           | 1,2- $\alpha$ -L-fucosidase                                                              | 0         | 29                    | 0         | 1         | 0         | 0         | 0         | 7          | 9          | 17         | 1         | 2         | 3         | 0         | 0         | 0         | 4          | 0         | 7          |
| GH106                                          | $\alpha$ -L-rhamnosidase                                                                 | 0         | 21                    | 1         | 0         | 0         | 0         | 0         | 4          | 9          | 12         | 1         | 2         | 1         | 0         | 0         | 0         | 3          | 1         | 10         |
| GH13                                           | $\alpha$ -amylase                                                                        | 3         | 3                     | 2         | 2         | 3         | 2         | 1         | 7          | 6          | 7          | 2         | 3         | 2         | 2         | 2         | 2         | 3          | 0         | 3          |
| GH20                                           | $\beta$ -hexosaminidase                                                                  | 0         | 14                    | 0         | 4         | 0         | 0         | 0         | 3          | 5          | 2          | 2         | 2         | 3         | 1         | 2         | 4         | 10         | 1         | 3          |
| GH5                                            | endoglucanase, endomannanase, $\beta$ -glucosidase, $\beta$ -mannosidase                 | 0         | 4                     | 0         | 1         | 4         | 1         | 3         | 13         | 4          | 10         | 0         | 0         | 0         | 0         | 0         | 1         | 6          | 1         | 6          |
| GH28                                           | polygalacturonases, related to pectin degradation                                        | 0         | 1                     | 0         | 0         | 0         | 0         | 0         | 7          | 11         | 2          | 8         | 8         | 3         | 1         | 0         | 1         | 0          | 1         | 3          |
| GH43                                           | $\alpha$ -L-arabinofuranosidases, endo- $\alpha$ -L-arabinanases, $\beta$ -D-xylosidases | 1         | 4                     | 0         | 2         | 2         | 0         | 0         | 11         | 15         | 9          | 1         | 1         | 2         | 0         | 0         | 0         | 0          | 0         | 2          |
| Counts of other GH genes                       |                                                                                          | 9         | 86                    | 7         | 18        | 29        | 10        | 10        | 95         | 83         | 119        | 12        | 15        | 32        | 19        | 10        | 13        | 68         | 11        | 77         |
| <b>Total counts of all GH genes</b>            |                                                                                          | <b>17</b> | <b>239</b>            | <b>10</b> | <b>32</b> | <b>40</b> | <b>13</b> | <b>14</b> | <b>193</b> | <b>186</b> | <b>235</b> | <b>39</b> | <b>48</b> | <b>66</b> | <b>23</b> | <b>14</b> | <b>21</b> | <b>119</b> | <b>22</b> | <b>138</b> |
| <b>Total number of GH families represented</b> |                                                                                          | <b>12</b> | <b>48</b>             | <b>7</b>  | <b>23</b> | <b>23</b> | <b>7</b>  | <b>10</b> | <b>53</b>  | <b>49</b>  | <b>58</b>  | <b>19</b> | <b>21</b> | <b>26</b> | <b>10</b> | <b>10</b> | <b>13</b> | <b>35</b>  | <b>15</b> | <b>45</b>  |

**Fig. 4.** Gene counts for the top 10 most abundant GH families, total gene counts for all GH families, and the number of GH families represented by these genes. MAGs are ordered as in the clustering in Fig. 2.



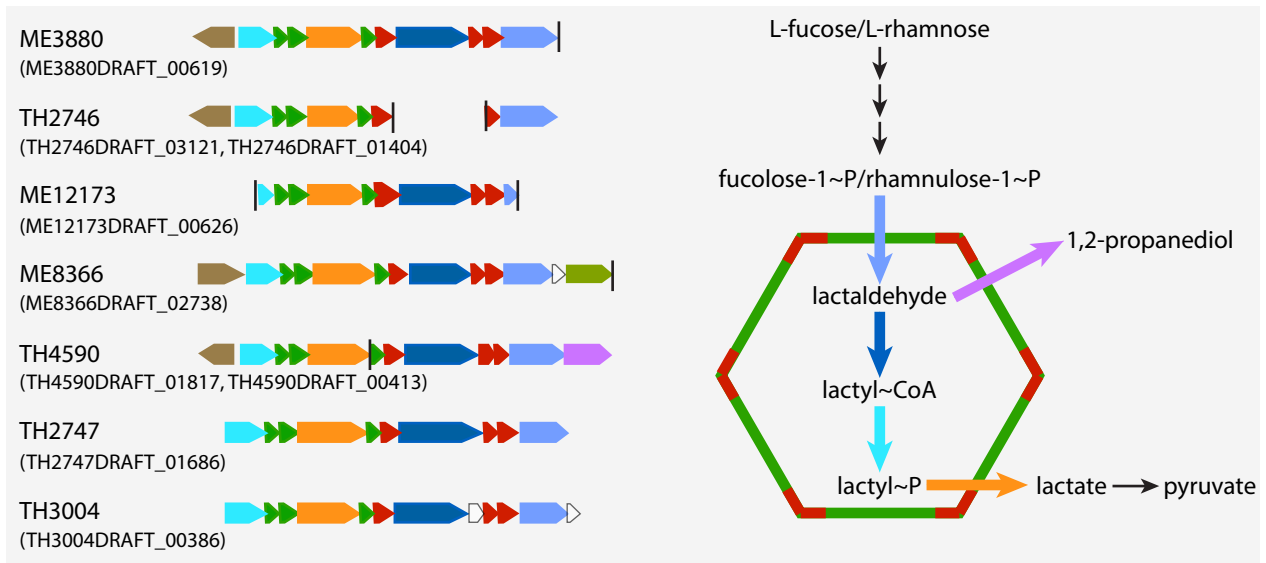

**Fig. 4.** Gene clusters encoding bacterial microcompartments (BMCs) involved in L-fucose and L-rhamnose degradation. The vertical line indicates the end of a contig, and IMG gene locus tag for the first gene in each presented gene cluster is indicated in the parenthesis. The BMC is schematically represented by a hexagon with the two building blocks labeled in red and green, respectively. The two building blocks and reactions inside the BMC are colored according to their encoding genes' color labels on the left side.

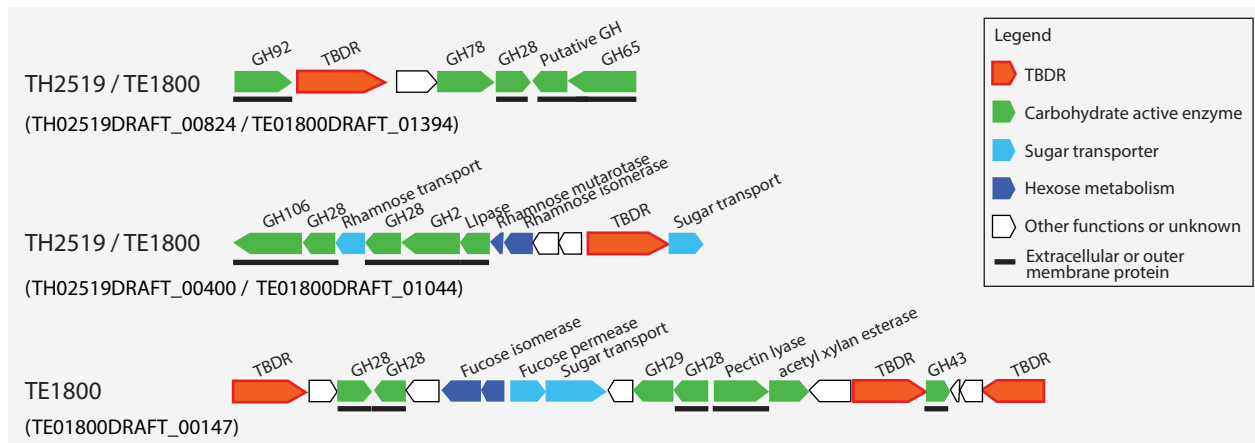

**Fig. 5.** Gene clusters encoding putative tonB-dependent carbohydrate utilization (CUT) loci. IMG gene locus tag for the first gene in each presented gene cluster is indicated in the parenthesis. The horizontal solid lines below genes indicate predicted extracellular or outer membrane proteins.

| Genes and Pathways                                                  | ME3880 | TH2746 | ME12612 | ME12173 | TE4605 | ME6381 | ME8366 | TH2747 | TH3004 | TH0989 | TH2519 | TE1800 | TH4590 | ME2014 | ME12657 | TE1301 | TH4093 | ME30509 | TH4820 |
|---------------------------------------------------------------------|--------|--------|---------|---------|--------|--------|--------|--------|--------|--------|--------|--------|--------|--------|---------|--------|--------|---------|--------|
| <b>Central carbon metabolism</b>                                    |        |        |         |         |        |        |        |        |        |        |        |        |        |        |         |        |        |         |        |
| Glycolysis (Embden-Meyerhof pathway), glucose => pyruvate           | 0.78   | 0.89   | 0.89    | 0.67    | 1      | 0.89   | 0.78   | 1      | 0.89   | 1      | 0.67   | 0.89   | 1      | 0.89   | 0.56    | 1      | 0.89   | 0.56    | 0.33   |
| Glycolysis (Entner-Doudoroff pathway)                               | (0)    | (0)    | (0)     | (0)     | (0)    | (0)    | (0)    | (0)    | (0)    | (0)    | (0)    | (0)    | (0)    | (0)    | (0)     | (0)    | (0)    | (0)     | (0)    |
| Pentose phosphate pathway (Pentose phosphate cycle)                 | 0.86   | 0.71   | 0.71    | 0.71    | 0.86   | 0.57   | 0.71   | 1      | 0.86   | 1      | 0.71   | 0.86   | 1      | 0.86   | 0.57    | 1      | 0.71   | 0.29    | 0.43   |
| Pyruvate oxidation, pyruvate => acetyl-CoA                          | 1      | 1      | 1       | 0       | 1      | 1      | 1      | 1      | 1      | 1      | 1      | 1      | 1      | 1      | 1       | 1      | 1      | 1       | 1      |
| Citrate cycle (TCA cycle, Krebs cycle)                              | 0.63   | 0.88   | 1       | 0.38    | 0.75   | 0.63   | 0.88   | 0.88   | 0.88   | 0.75   | 1      | 1      | 0.88   | 0.63   | 0.75    | 1      | 0.5    | 0.25    | 0.25   |
| <b>Other carbohydrate metabolism</b>                                |        |        |         |         |        |        |        |        |        |        |        |        |        |        |         |        |        |         |        |
| Galactose degradation to glycerate-3P                               | 0.5    | 0.75   | 0.75    | 0.25    | 0.75   | 0.5    | 0.5    | 1      | 0.75   | 1      | 0.5    | 0.5    | 0.75   | 0.25   | 0.25    | 0.5    | 0.75   | 0.25    | 0.5    |
| Rhamnose degradation                                                | 1      | 1      | 0.75    | 0.5     | 0.5    | 0.5    | 0.5    | 1      | 1      | 1      | 0.75   | 1      | 0.75   | 0.5    | 0.5     | 0.5    | 1      | 0.5     | 0.75   |
| Fucose degradation                                                  | 1      | 0.75   | 0.75    | 0.25    | 0.75   | 0.5    | 0.75   | 1      | 0.75   | 0.75   | 0.5    | 0.75   | 0.75   | 0.75   | 0.5     | 0.75   | 1      | 0.75    | 0.75   |
| L-Arabinose degradation to xylulose-P for pentose pathway           | 1      | 1      | 0       | 0       | 0.67   | 0.33   | 0.33   | 1      | 1      | 1      | 0      | 0      | 0.33   | 0      | 0       | 0      | 0.67   | 0.33    | 0.33   |
| Xylose degradation                                                  | 1      | 1      | 1       | 1       | 1      | 0.5    | 1      | 1      | 1      | 1      | 0.5    | 1      | 1      | 1      | 1       | 1      | 0.5    | 1       | 1      |
| D-Galacturonate degradation to pyruvate & D-glyceraldehyde 3P       | (0)    | (0)    | (0)     | (0)     | 0.8    | 0.2    | (0)    | 0.6    | (0)    | (0)    | (0)    | (0)    | (0)    | (0)    | (0)     | (0)    | (0)    | (0)     | (0)    |
| D-Glucuronate degradation to pyruvate and D-glyceraldehyde 3P       | 0      | 0.6    | 0.4     | 0.4     | 0.6    | 0      | 0.2    | 0.6    | 0.8    | 0.6    | 0.6    | 0.8    | 0.6    | 0.2    | 0.4     | 0.4    | 0.6    | 0.4     | 0.8    |
| Mannose degradation to glucose-P                                    | 0.5    | 1      | 1       | 1       | 1      | 1      | 1      | 1      | 1      | 1      | 1      | 1      | 1      | 1      | 0.5     | 0.5    | 1      | 0.5     | 1      |
| Lactaldehyde degradation to pyruvate (Aerobic)                      | 1      | 1      | 0.33    | 1       | 0.33   | 0.33   | 1      | 1      | 1      | 0.67   | 0.33   | 0.33   | 1      | 0.33   | 0.33    | 0.33   | 0.67   | 0.67    | 0.67   |
| Glycogen biosynthesis from alpha-D-glucose-6P via ADP-D glucose     | 0.75   | 0.25   | 0.75    | 0.75    | 0.75   | 0.5    | 1      | 1      | 0.75   | 1      | 0.5    | 0.5    | 1      | 1      | 1       | 1      | 0.5    | 0       | 0.75   |
| <b>Fermentation</b>                                                 |        |        |         |         |        |        |        |        |        |        |        |        |        |        |         |        |        |         |        |
| Pyruvate to acetate via acetyl-coA                                  | 1      | 1      | 0.67    | 0.67    | 0.33   | 0.33   | 1      | 1      | 1      | 0.67   | 0.33   | 0.33   | 1      | 0.67   | 0.67    | 0.67   | 1      | 1       | 1      |
| Pyruvate to propanoate                                              | (0)    | (0)    | (0)     | (0)     | (0)    | (0)    | (0)    | (0)    | (0)    | (0)    | (0)    | (0)    | (0)    | (0)    | (0)     | (0)    | (0)    | (0)     | (0)    |
| Pyruvate to succinate                                               | (0)    | (0)    | (0)     | (0)     | (0)    | (0)    | (0)    | (0)    | (0)    | (0)    | (0)    | (0)    | (0)    | (0)    | (0)     | (0)    | (0)    | (0)     | (0)    |
| Pyruvate to butanoate                                               | (0)    | (0)    | (0)     | (0)     | (0)    | (0)    | (0)    | (0)    | (0)    | (0)    | (0)    | (0)    | (0)    | (0)    | (0)     | (0)    | (0)    | (0)     | (0)    |
| Pyruvate to butanol                                                 | 0.71   | 0.71   | 0.71    | 0.29    | 1      | 0.71   | 0.57   | 0.43   | 0.43   | 0.43   | 0.57   | 0.57   | 1      | 0.57   | 0.57    | 0.57   | 0.43   | 0.43    | 0.43   |
| Pyruvate to ethanol                                                 | (0)    | (0)    | (0)     | (0)     | (0)    | (0)    | (0)    | (0)    | (0)    | (0)    | (0)    | (0)    | (0)    | (0)    | (0)     | (0)    | (0)    | (0)     | (0)    |
| Pyruvate to lactate                                                 | 0      | 0      | 0       | 0       | 0      | 0      | 0      | 0      | 0      | 0      | 1      | 1      | 1      | 0      | 0       | 0      | 0      | 0       | 0      |
| Pyruvate to acetone                                                 | (0)    | (0)    | (0)     | (0)     | (0)    | (0)    | (0)    | (0)    | (0)    | (0)    | (0)    | (0)    | (0)    | (0)    | (0)     | (0)    | (0)    | (0)     | (0)    |
| <b>Nitrogen related</b>                                             |        |        |         |         |        |        |        |        |        |        |        |        |        |        |         |        |        |         |        |
| Dissimilatory nitrate reduction, nitrate => ammonia                 | 0      | 0      | 0       | 0       | 0      | 0      | 0      | 0      | 0      | 0      | 0      | 0      | (0)    | 0      | 0       | 0      | 0      | 0       | (0)    |
| Denitrification, nitrate => nitrogen gas                            | 0      | 0      | 0       | 0       | 0      | 0      | 0      | 0.25   | 0.25   | 0      | 0      | 0      | 0      | 0      | 0       | 0      | 0      | 0       | 0      |
| TMAO (trimethylamine-N-oxide) reduction                             | 0      | 0      | 0       | 0       | 0      | 0      | 0      | 0      | 0      | 0      | 0      | 0      | 0      | 0      | 0       | 0      | 0      | 0       | 0      |
| Nitrification, ammonia => nitrite                                   | 0      | 0      | 0       | 0       | 0      | 0      | 0      | 0      | 0      | 0      | 0      | 0      | 0      | 0      | 0       | 0      | 0      | 0       | 0      |
| Nitrogen fixation, nitrogen => ammonia                              | 0      | 0      | 0       | 0       | 0      | 0      | 0      | 1      | 0      | 1      | 0      | 0      | 0      | 0      | 0       | 0      | 1      | 0       | 0      |
| Assimilatory nitrate reduction, nitrate => ammonia                  | 0      | 1      | 0       | 0       | (0)    | 0      | 0      | 0      | 0      | 0      | 0      | 0      | 0      | 0      | 0       | 0      | (0)    | 0       | (0)    |
| ABC-type urea transporter                                           | 0      | 0      | 0       | 1       | 0      | 0      | 0      | 0      | 0      | 1      | 0      | 0      | 0      | 0      | 0       | 1      | 0      | 0       | 0      |
| Urease (Urea ==> CO2 + NH3)                                         | 0      | 0      | 0       | 0       | 0      | 0      | 0      | 0      | 0      | 1      | 0      | 0      | 1      | 0      | 0       | 1      | 0      | 0       | 0      |
| Ammonia permease                                                    | 1      | 1      | 1       | 1       | 1      | 1      | 1      | 1      | 1      | 1      | 0      | 0      | 1      | 0      | 1       | 1      | 1      | 0       | 1      |
| <b>Phosphorus related</b>                                           |        |        |         |         |        |        |        |        |        |        |        |        |        |        |         |        |        |         |        |
| Alkaline phosphatase (PhoA)                                         | 1      | 1      | 1       | 1       | 0      | 0      | 1      | 0      | 0      | 0      | 0      | 0      | 0      | 1      | 1       | 1      | 1      | 0       | 0      |
| ABC-type phosphate-specific transporter (Pst) system, high-affinity | 0      | 1      | 1       | 1       | 1      | 1      | 1      | 1      | 1      | 1      | 1      | 1      | 1      | 0      | 1       | 1      | 1      | 1       | 0      |
| PIT inorganic phosphate transporter (PitA), permease, low-affinity  | 0      | 0      | 0       | 0       | 1      | 1      | 1      | 1      | 1      | 1      | 1      | 1      | 1      | 1      | 1       | 1      | 0      | 0       | 1      |
| Polyphosphate storage and utilization (PPK)                         | 0      | 1      | 1       | 1       | 1      | 1      | 1      | 1      | 1      | 1      | 1      | 1      | 1      | 1      | 1       | 1      | 1      | 1       | 0      |
| ABC-type phosphonate transport system                               | 0      | 0      | 0       | 0       | 0      | 0      | 0      | 0      | 0      | 0      | 0      | 0      | 0      | 0      | 0       | 0      | 0      | 0       | 0      |
| Phosphonoacetate degradation                                        | 0      | 1      | 0       | 1       | 1      | 0      | 1      | 1      | 1      | 0      | 0      | 0      | 1      | 0      | 0       | 0      | 0      | 0       | 0      |

**Fig. 6.** Completeness estimates of key metabolic pathways. MAGs are ordered as in the clustering in Fig. 2. Completeness value of “1” indicates a pathway is complete; “0” indicates no genes were found in that pathway; and “(0)” indicates that although some genes in a pathway are present, the pathway is likely absent because signature genes for that pathway were not found in that draft genome AND signature genes are missing in more than two thirds of all draft genomes.

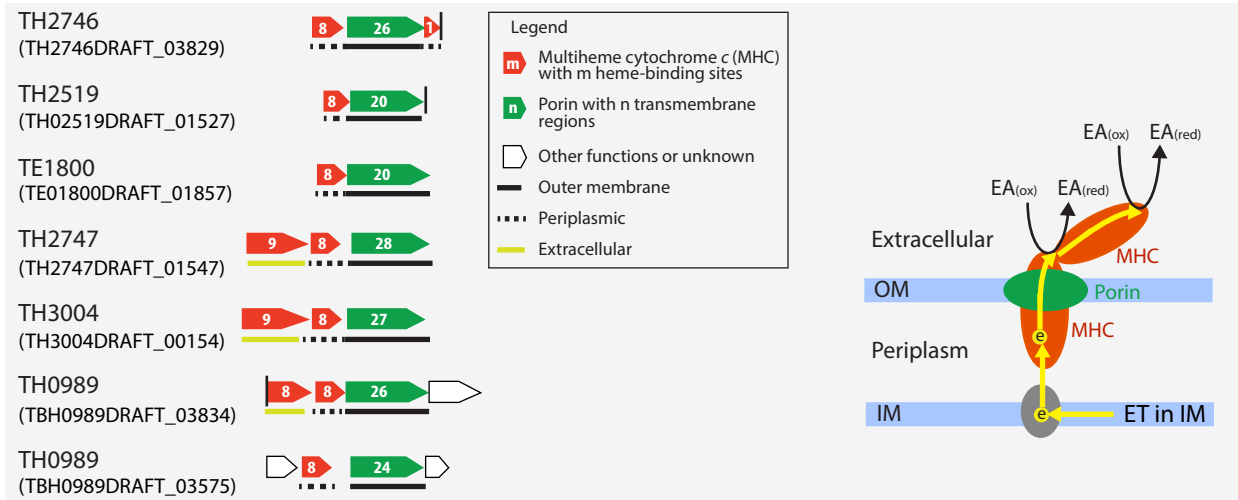

**Fig. 7.** Gene clusters encoding putative porin-multiheme cytochrome c complex (PCC). IMG gene locus tag for the first gene in each presented gene cluster is indicated in the parenthesis. The vertical line indicates the end of a contig, and horizontal lines below genes indicate predicted cellular locations of their encoded proteins. These putative PCC genes are in 18.1, 9.0, 6.1, 18.4, 70.0, 10.6 and 10.8 kbp long contigs, respectively. A hypothesized model of extracellular electron transfer is shown on the right with yellow arrows indicating electron flows. “IM” and “OM” refer to inner and outer membranes, respectively, “ET in IM” refers to electron transfer in the inner membrane, and “EA<sub>(ox)</sub>” and “EA<sub>(red)</sub>” refer to oxidized and reduced forms of the electron acceptor, respectively.

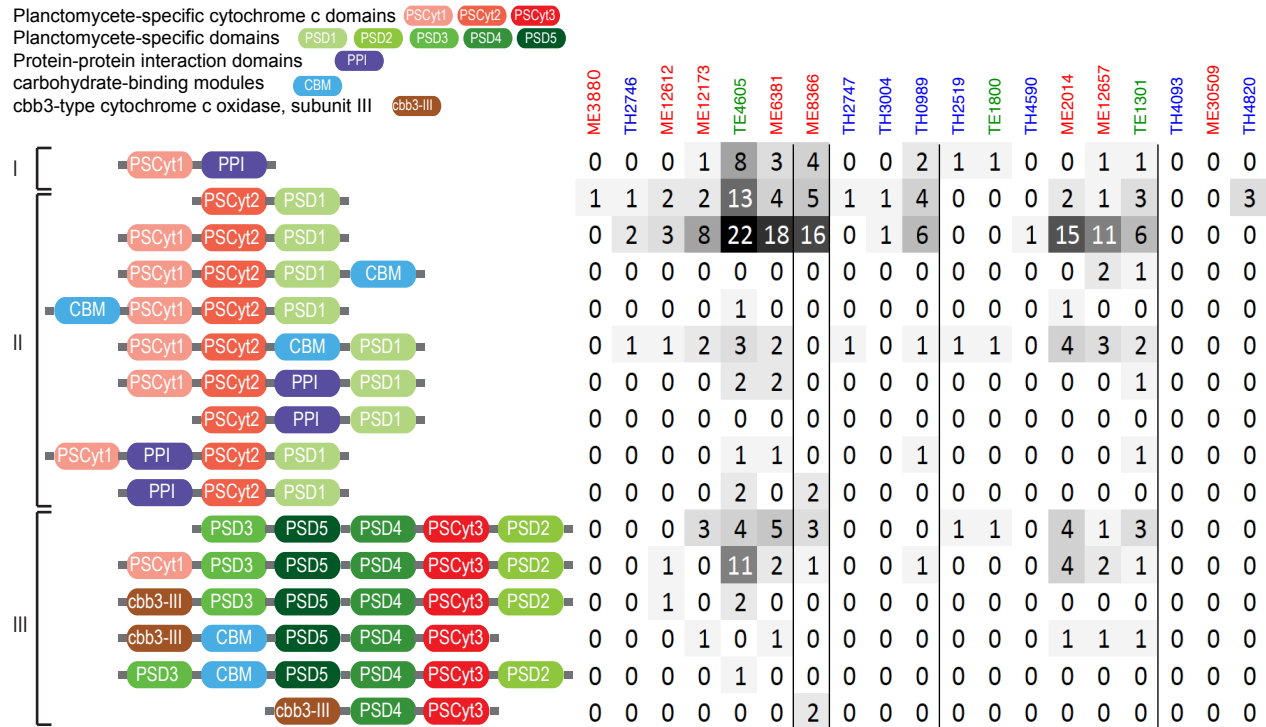

**Fig. 8.** Domain architecture and occurrence of PSCyt-containing genes. Based on the combination of specific PSCyt and PSD domains, these domain structures can be classified into three groups (I, II, and III). “CBM” refers to carbohydrate-binding modules, which include pfam13385 (Laminin\_G\_3), pfam08531 (Bac\_rhamnosid\_N), pfam08305 (NPCBM), pfam03422 (CBM\_6), and pfam07691 (PA14). “PPI” refers to protein-protein interaction domains, which include pfam02368 (Big\_2), pfam00400 (WD40), and pfam00754 (F5\_F8\_type\_C).
